# Supplementary material
Source: Research Square preprint supplement (doi:10.21203/rs.3.rs-9246525/v1)
Supplement: Supplementary file 1 [file 3b013aa73a03de33ac2c5f76.pdf]

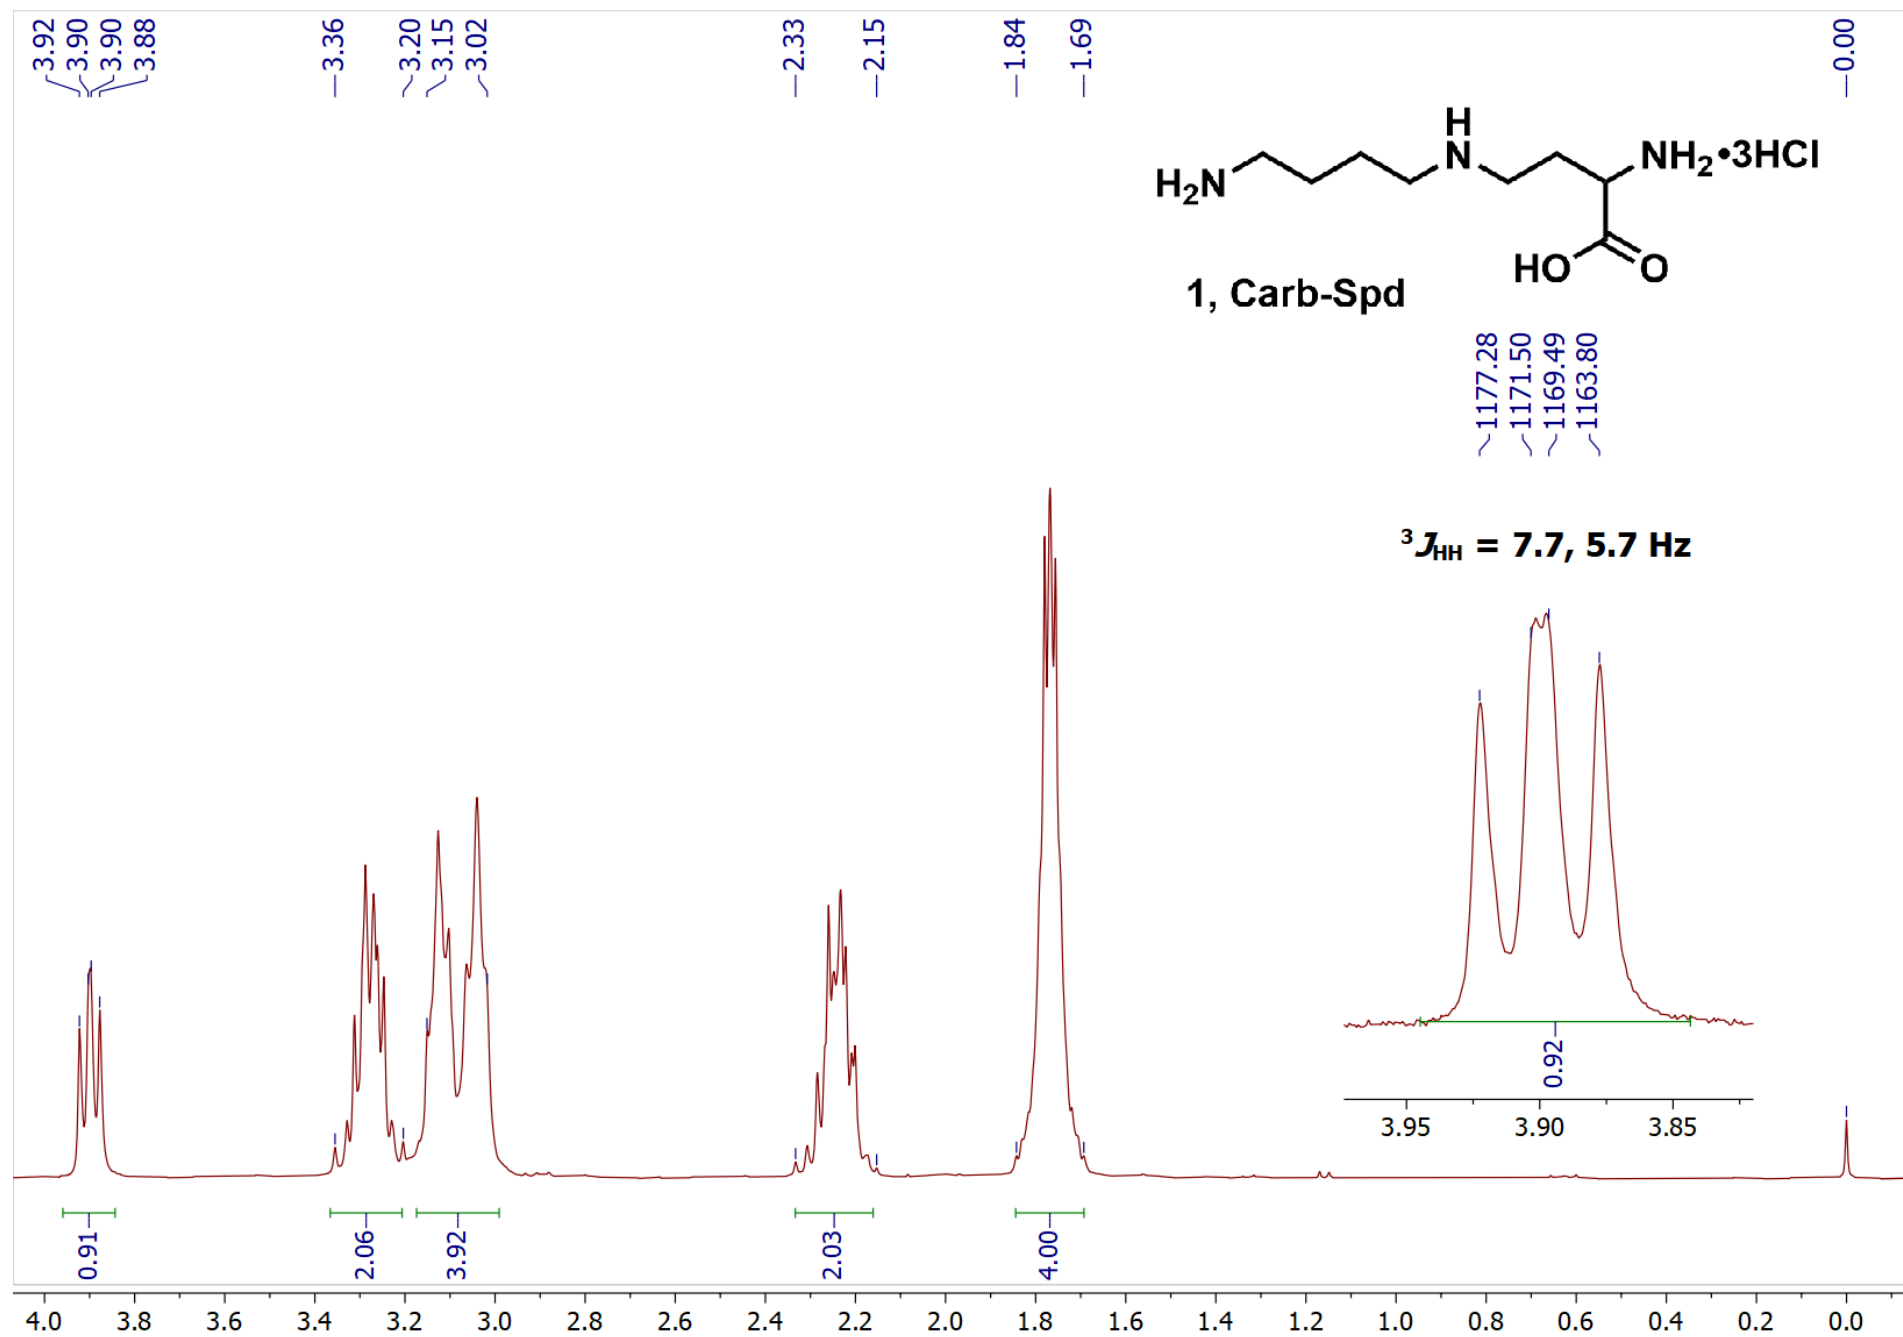

**Figure S1.**  $^1\text{H}$  NMR spectrum of Carb-Spd, **1**.



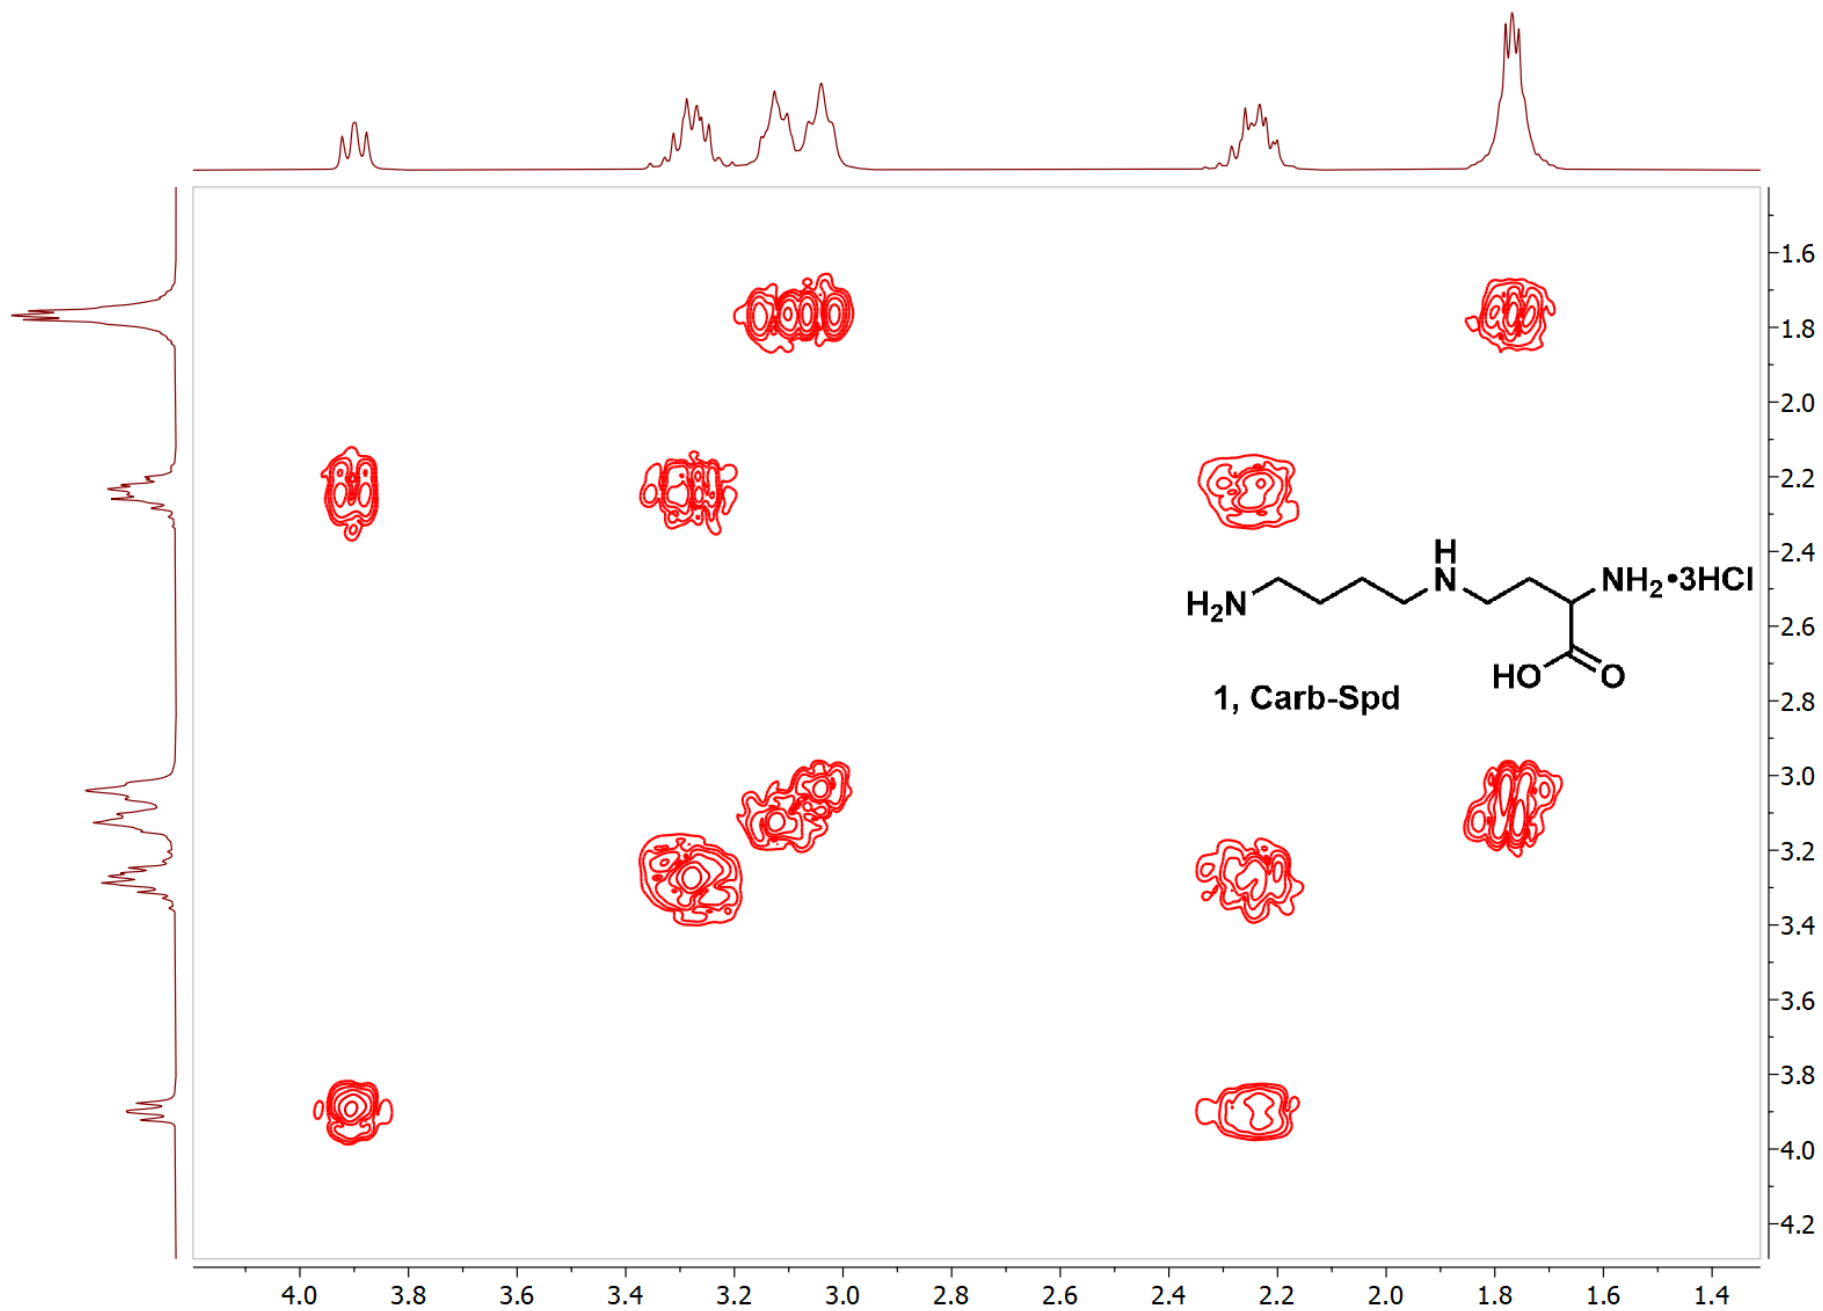

**Figure S3.** COSY spectrum of Carb-Spd, **1**.

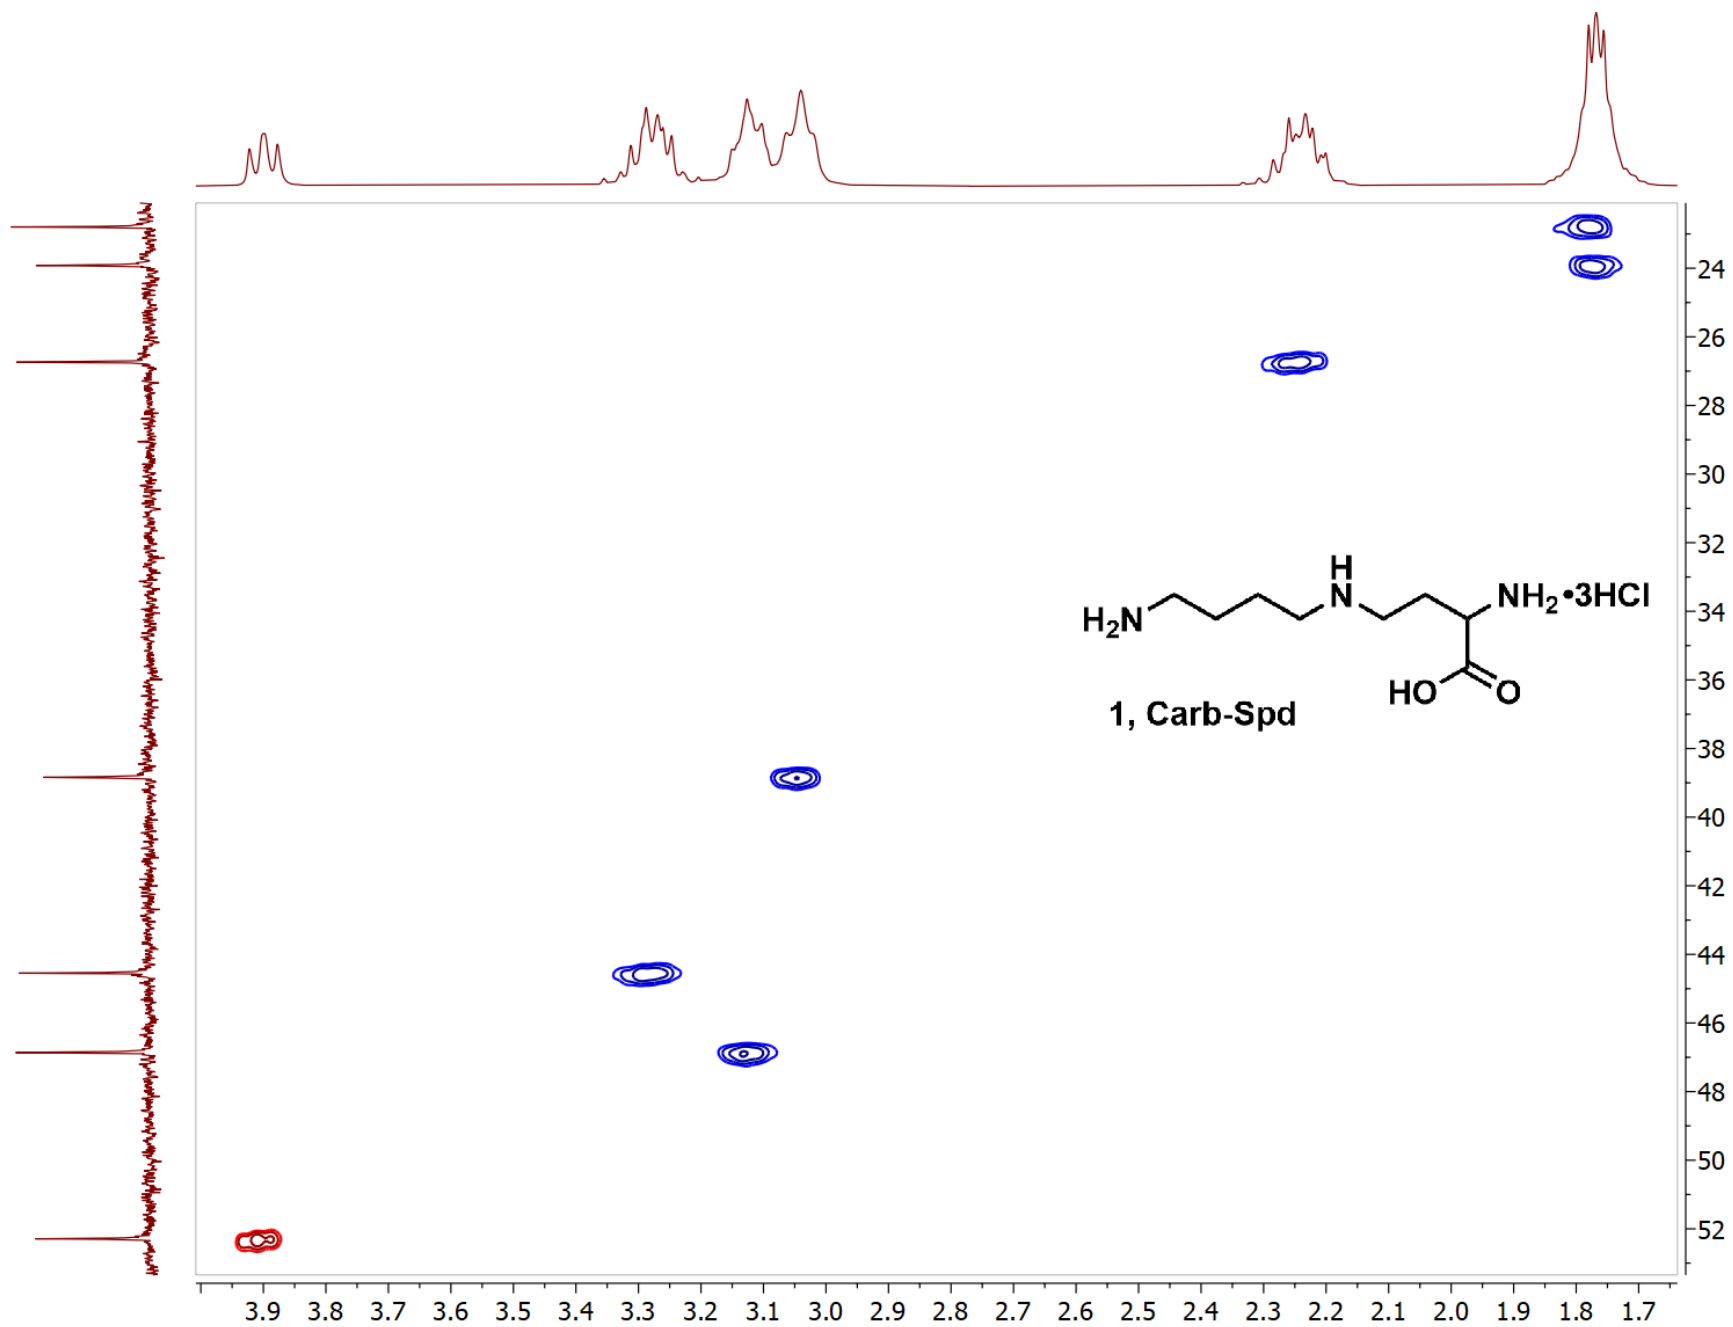

Figure S4. HSQC spectrum of Carb-Spd, 1.

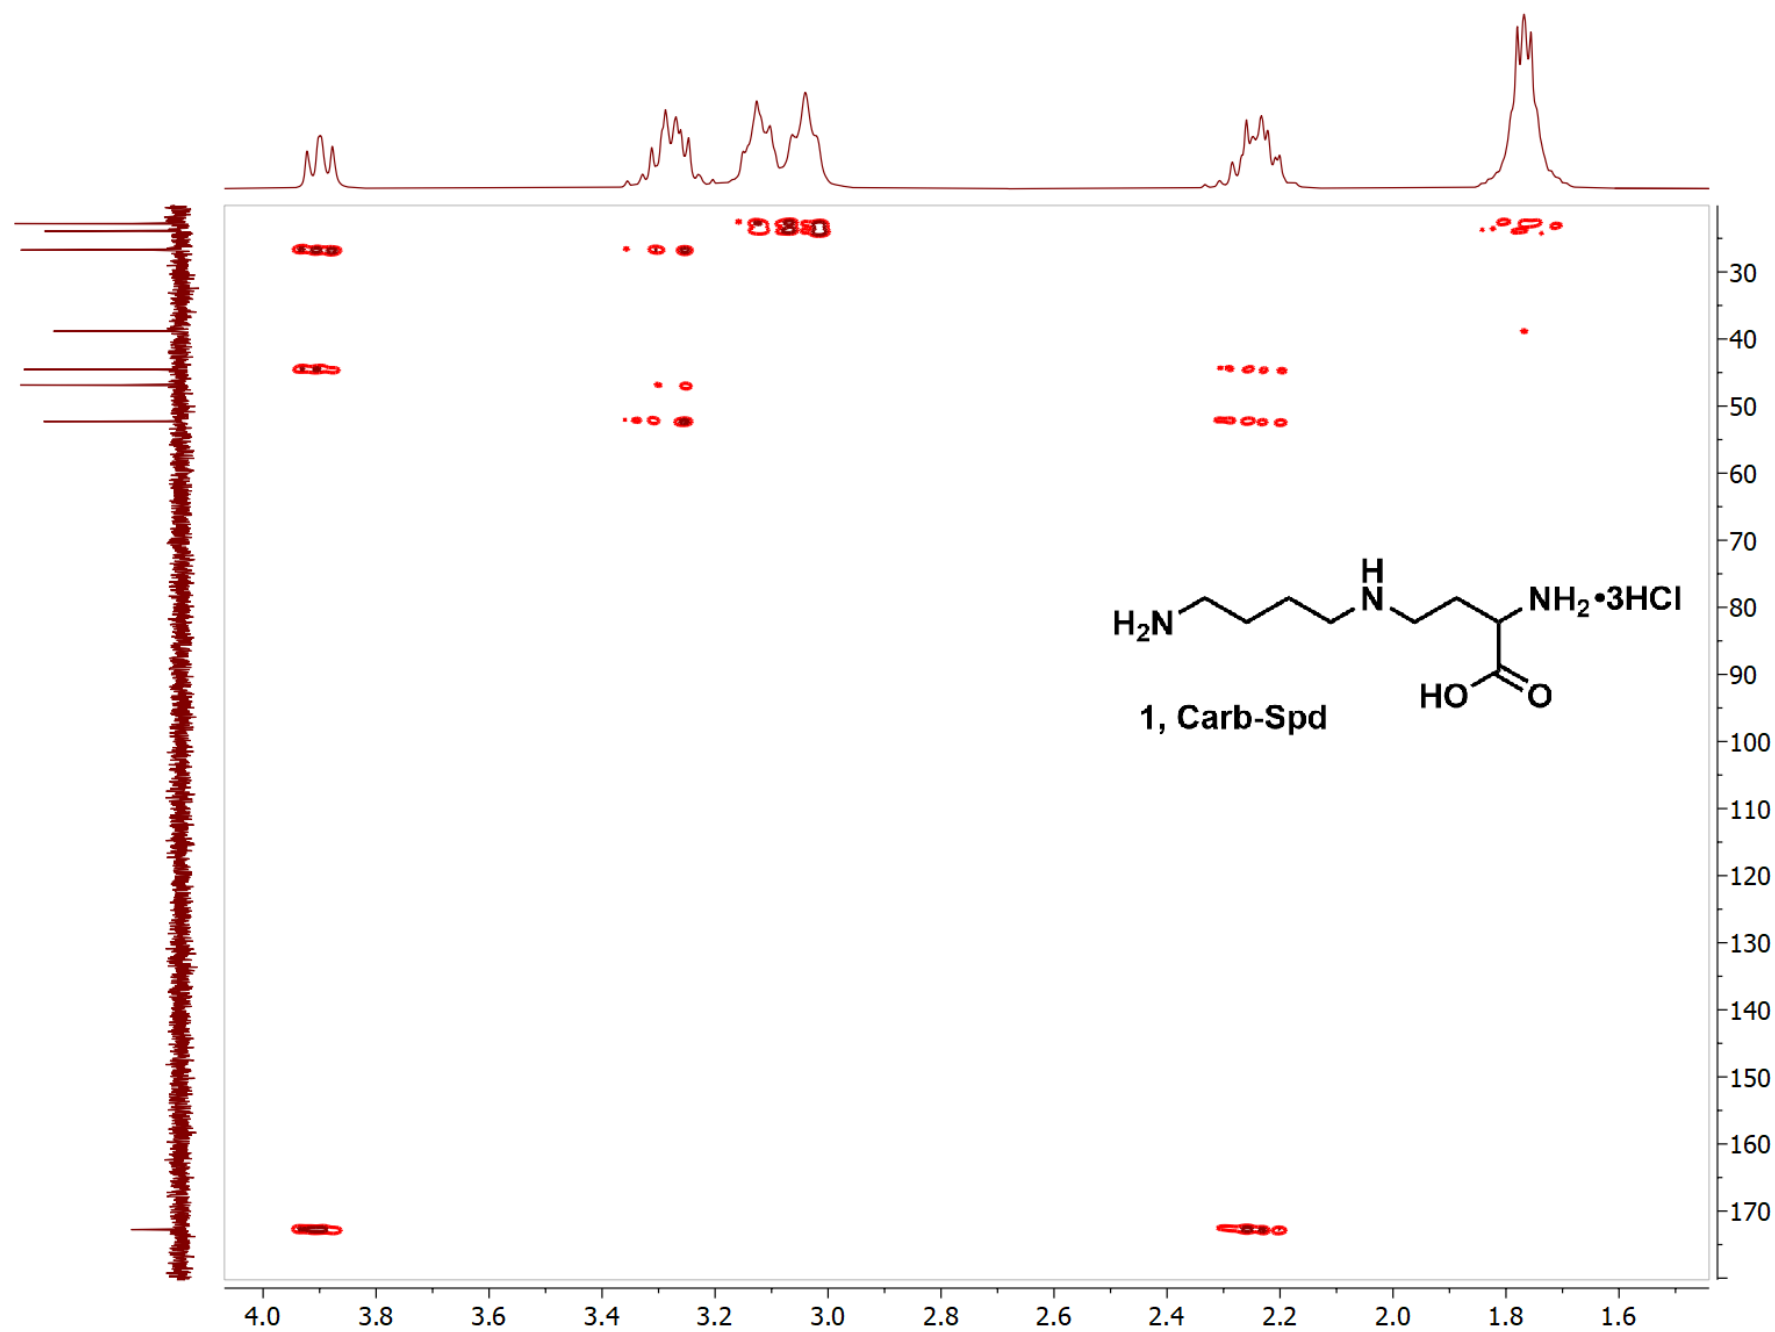

Figure S5. HMBC spectrum of Carb-Spd, 1.

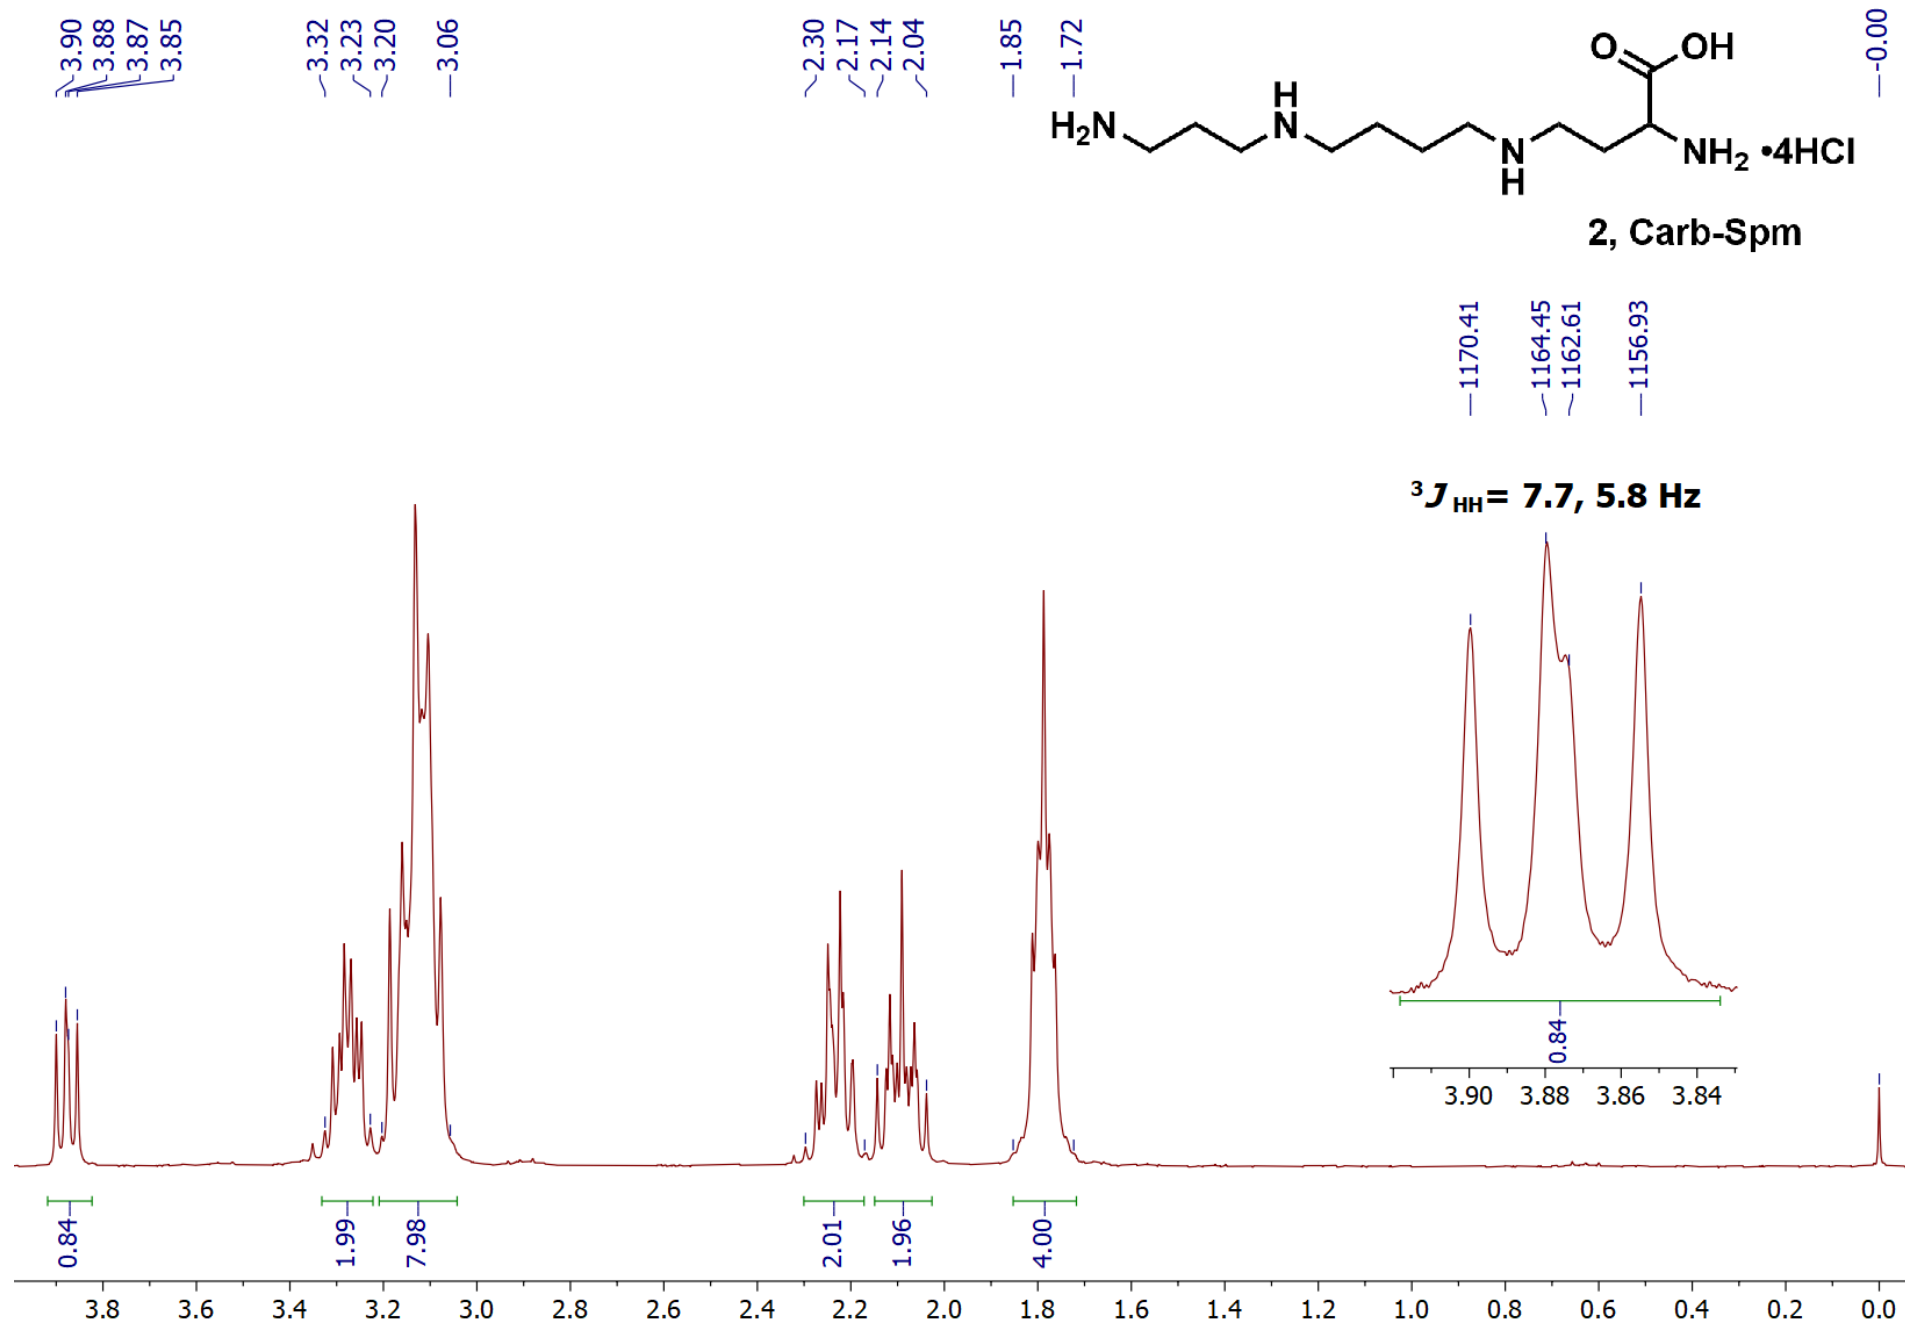

**Figure S6.**  $^1\text{H}$  NMR spectrum of Carb-Spm, **2**.

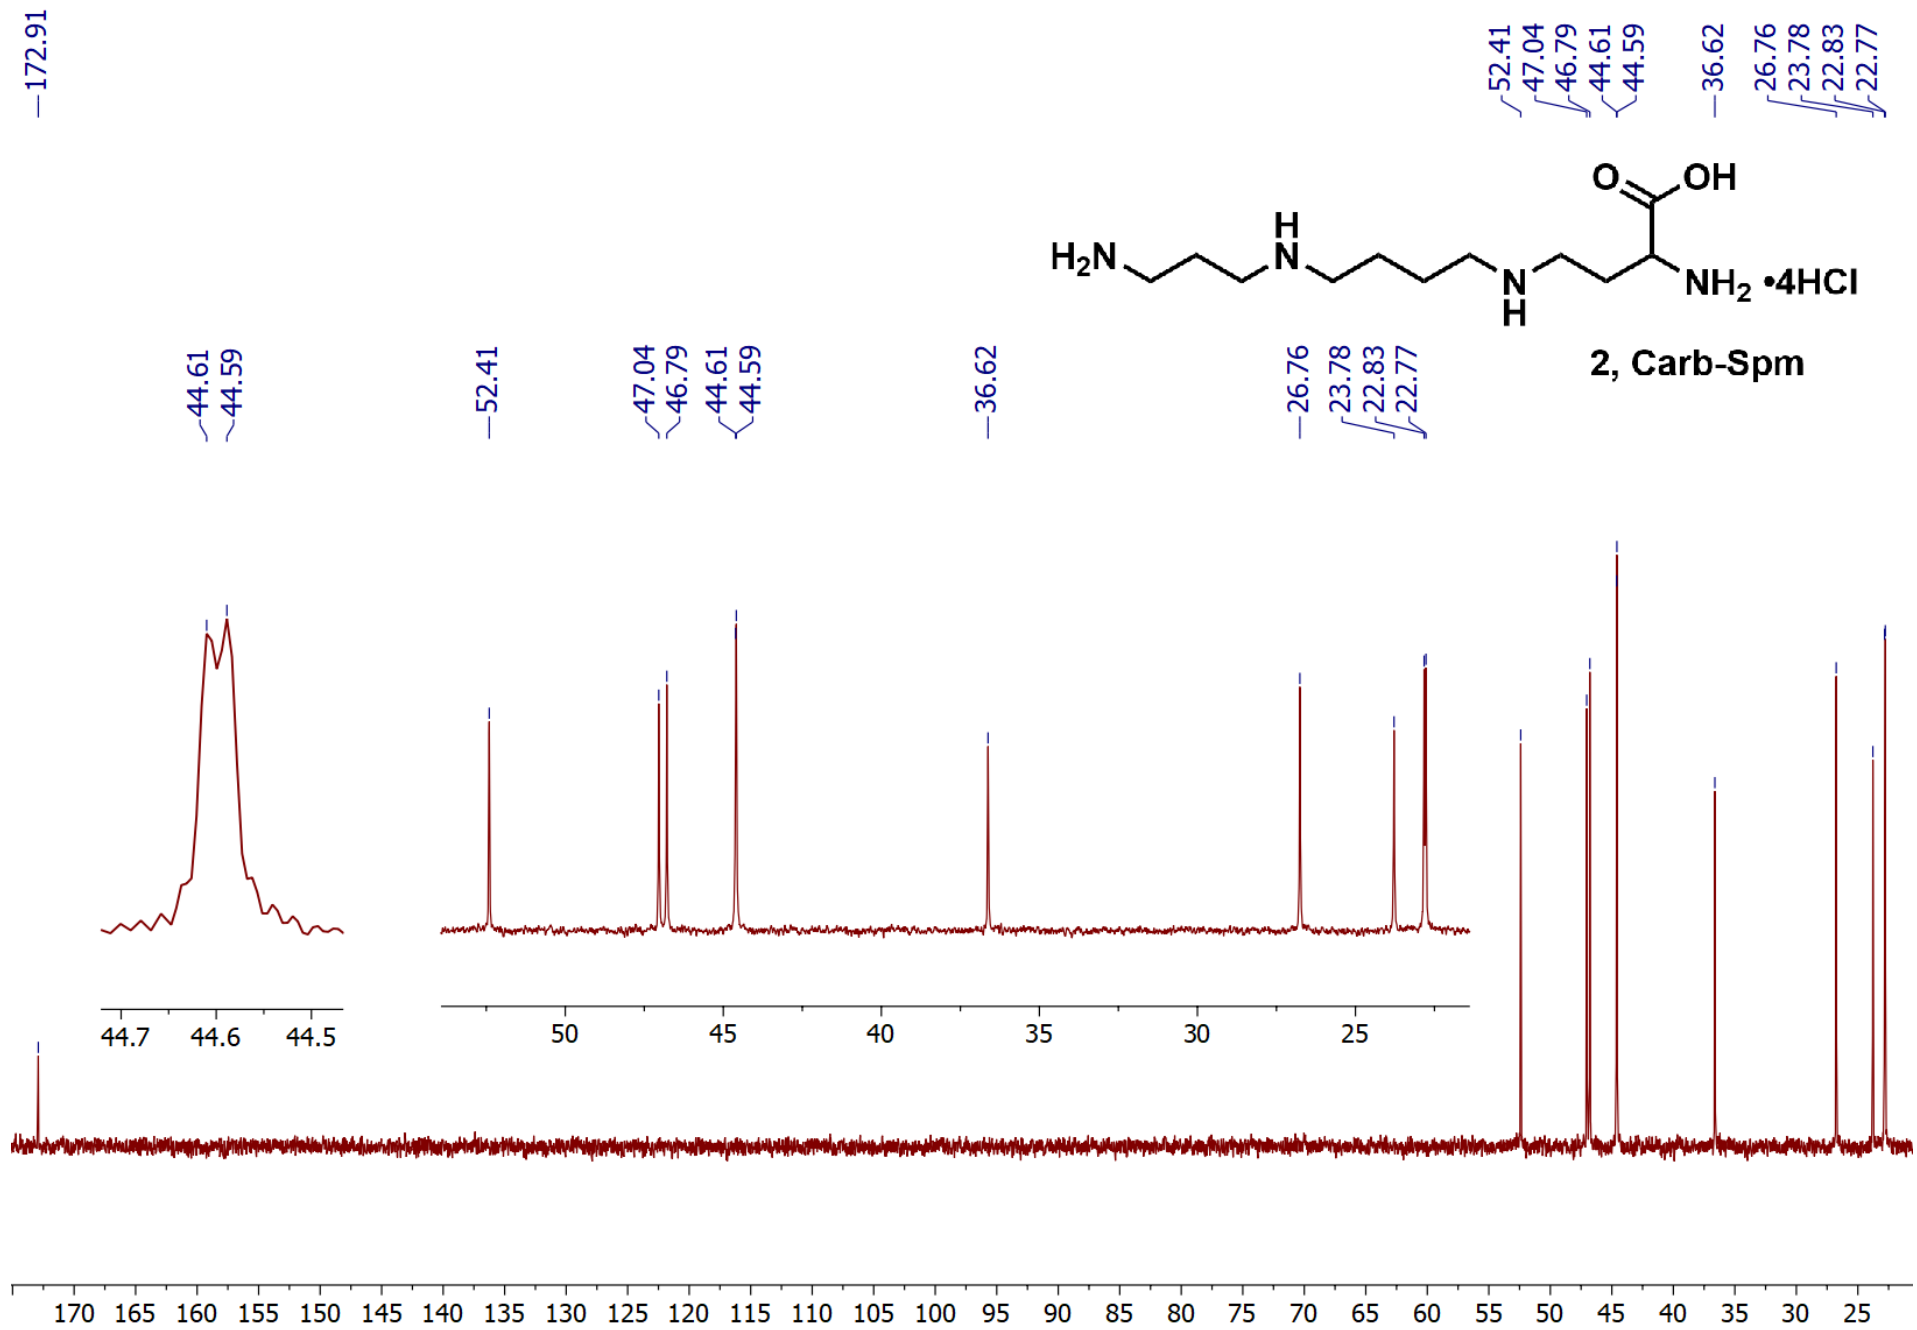

**Figure S7.**  $^{13}\text{C}$  NMR spectrum of Carb-Spm, **2**.

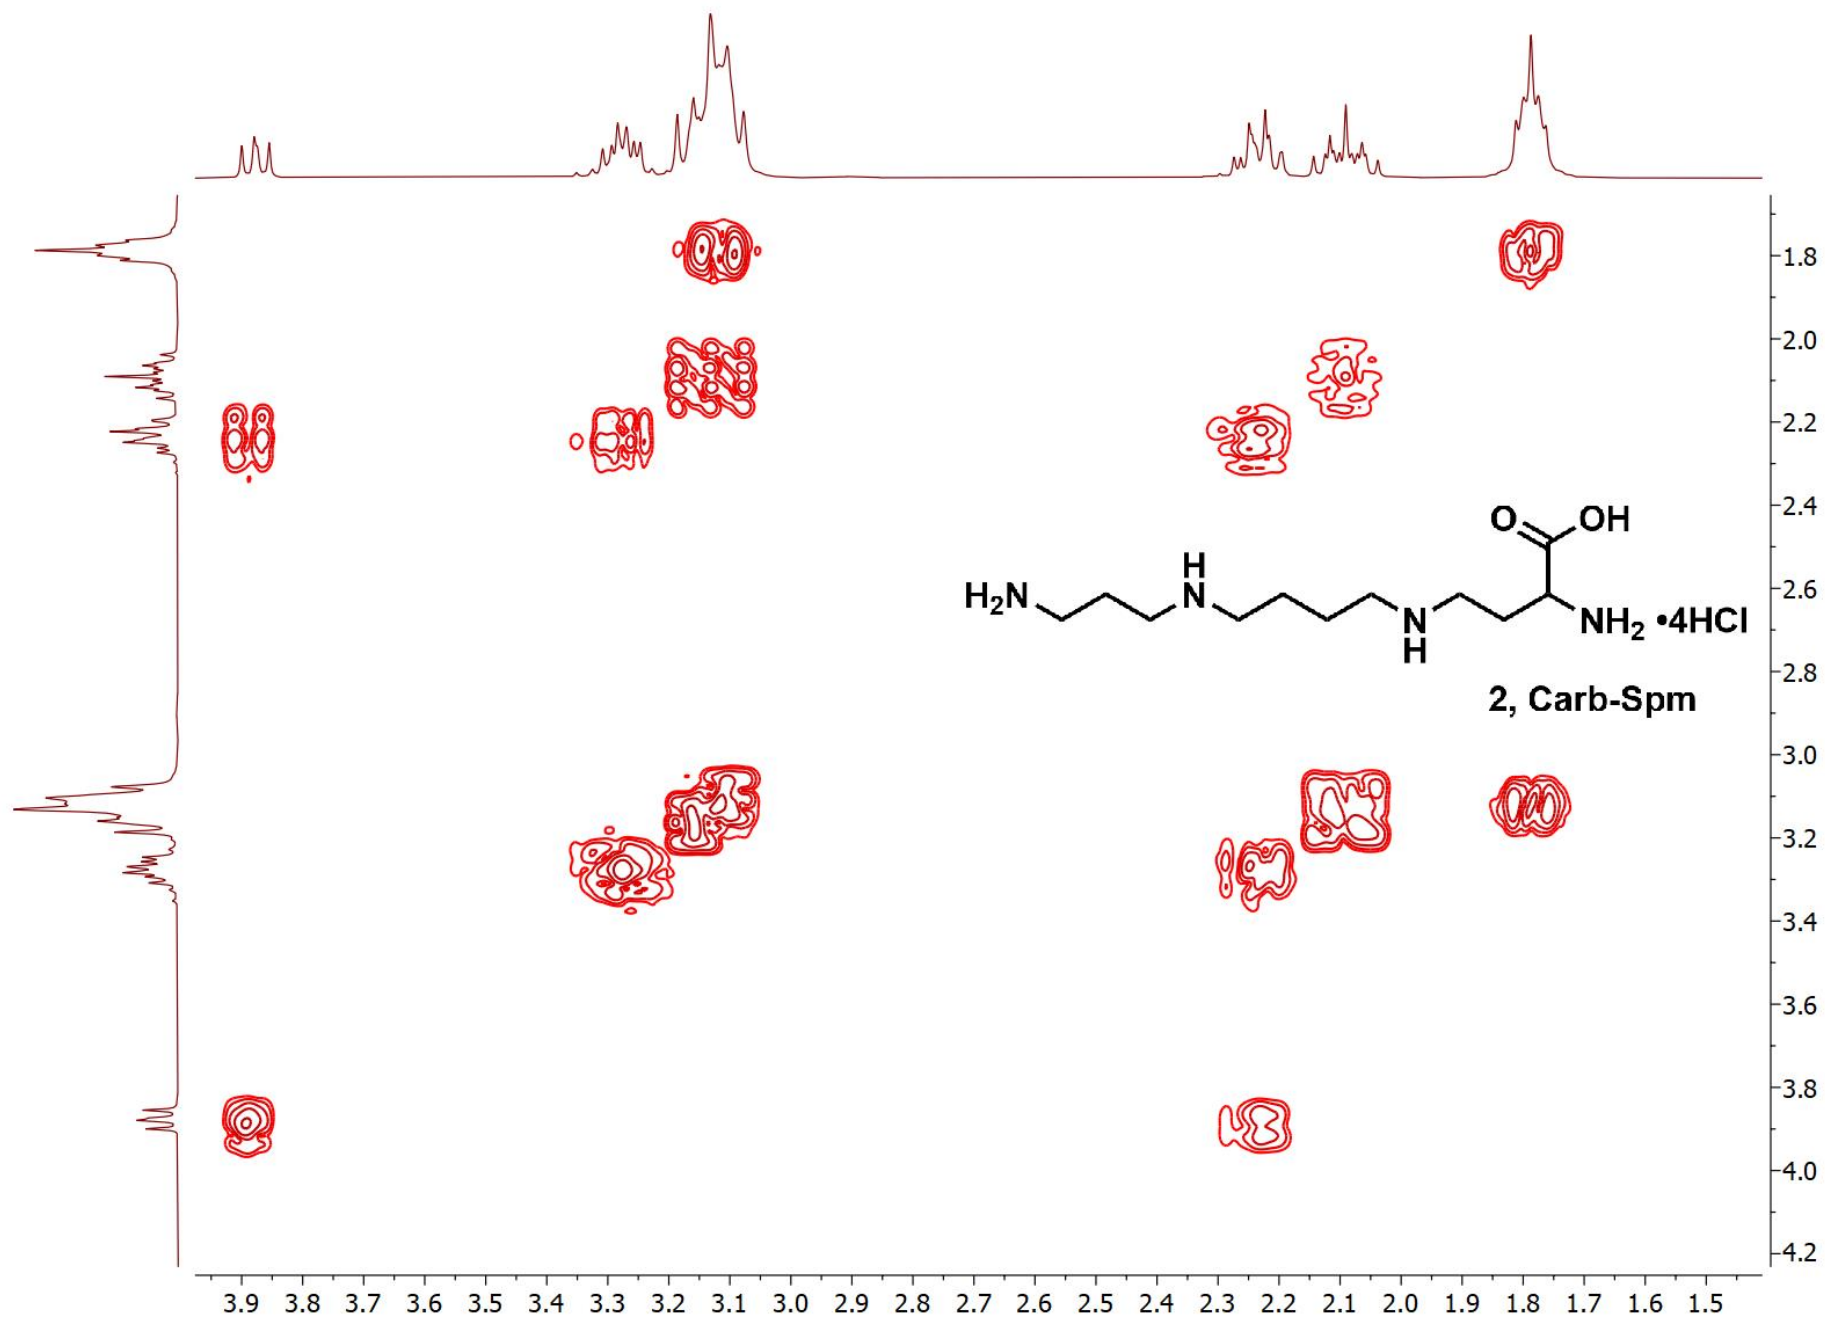

**Figure S8.** COSY spectrum of Carb-Spm, **2**.

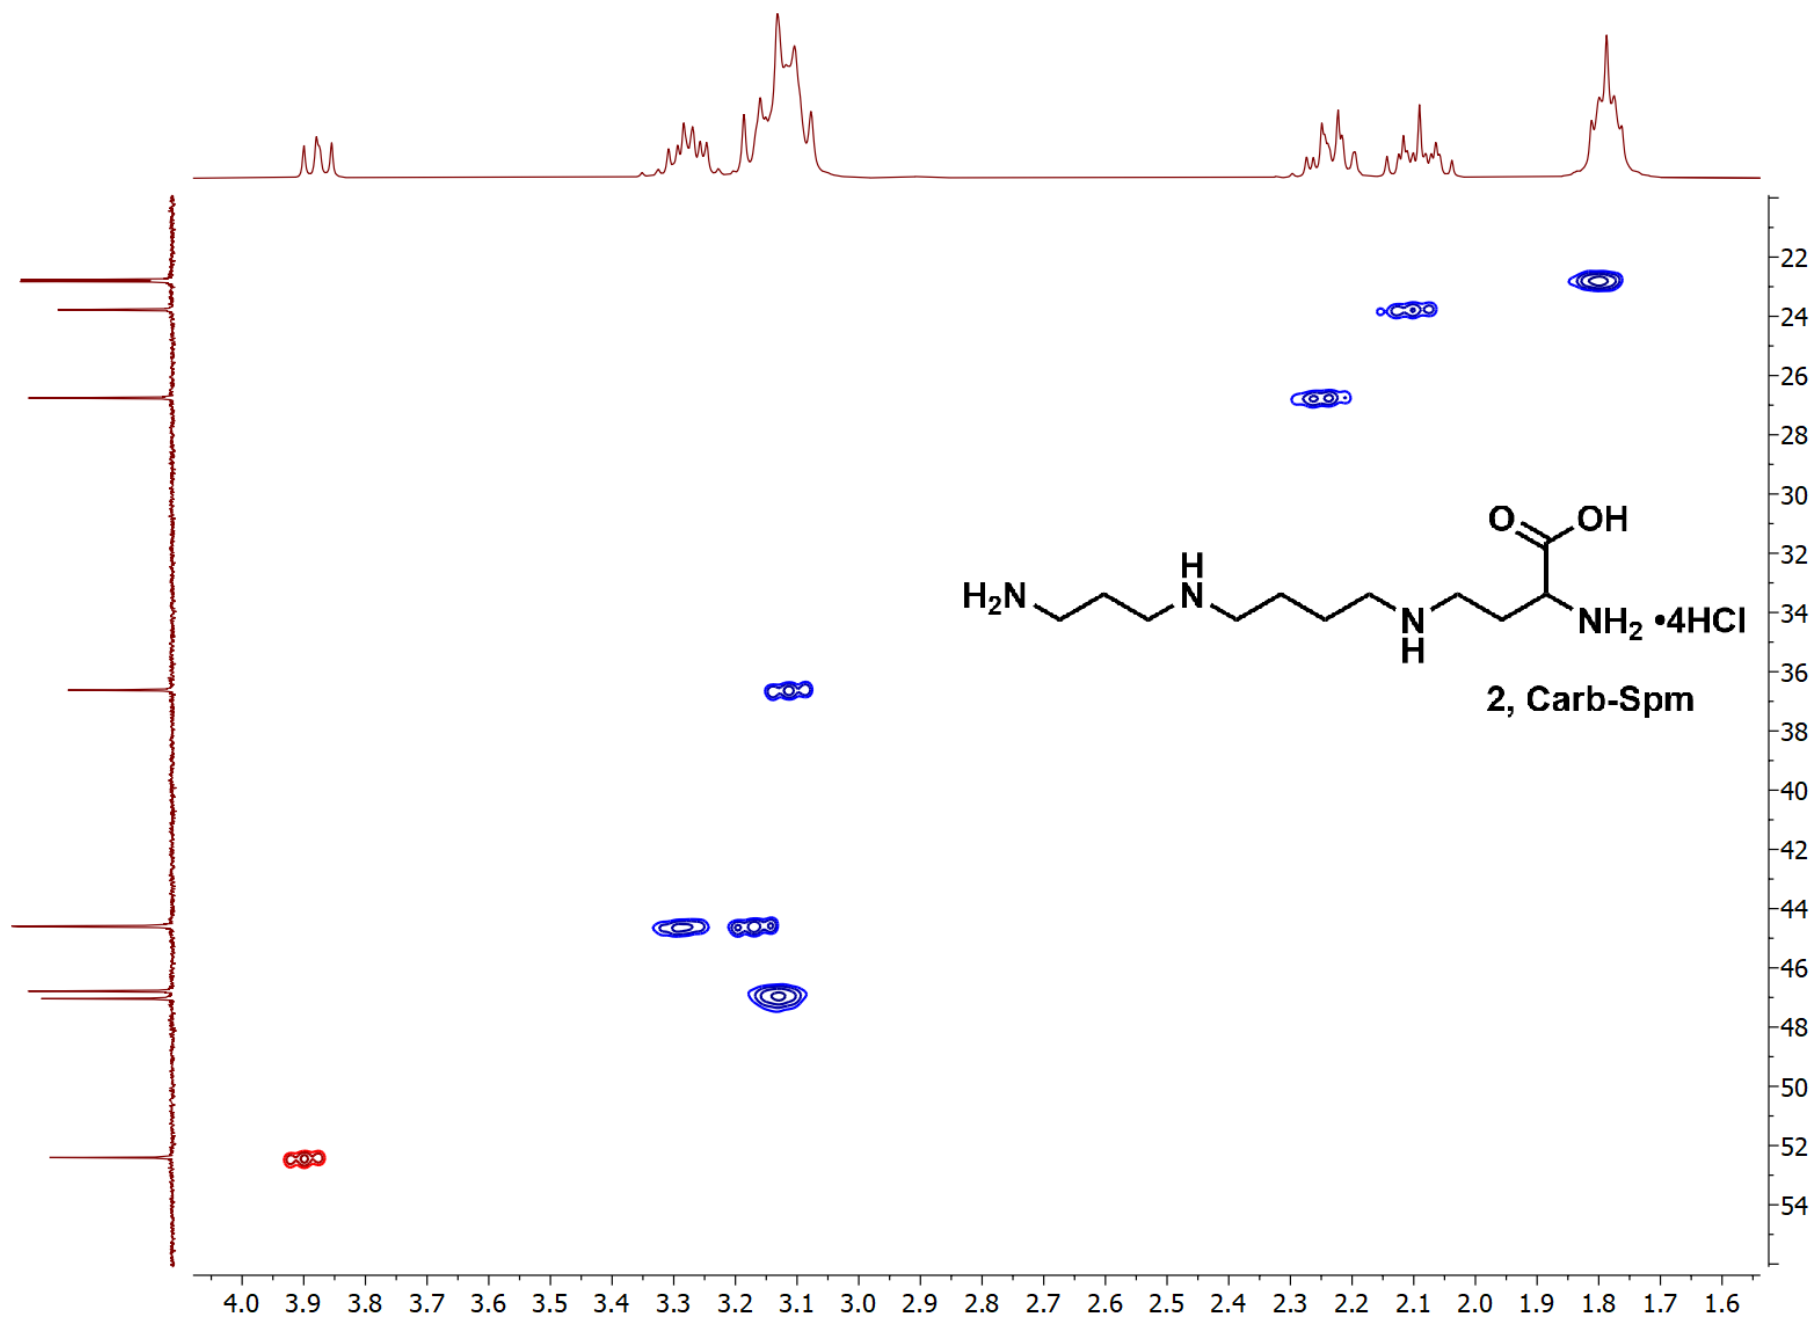

Figure S9. HSQC spectrum of Carb-Spm, 2.

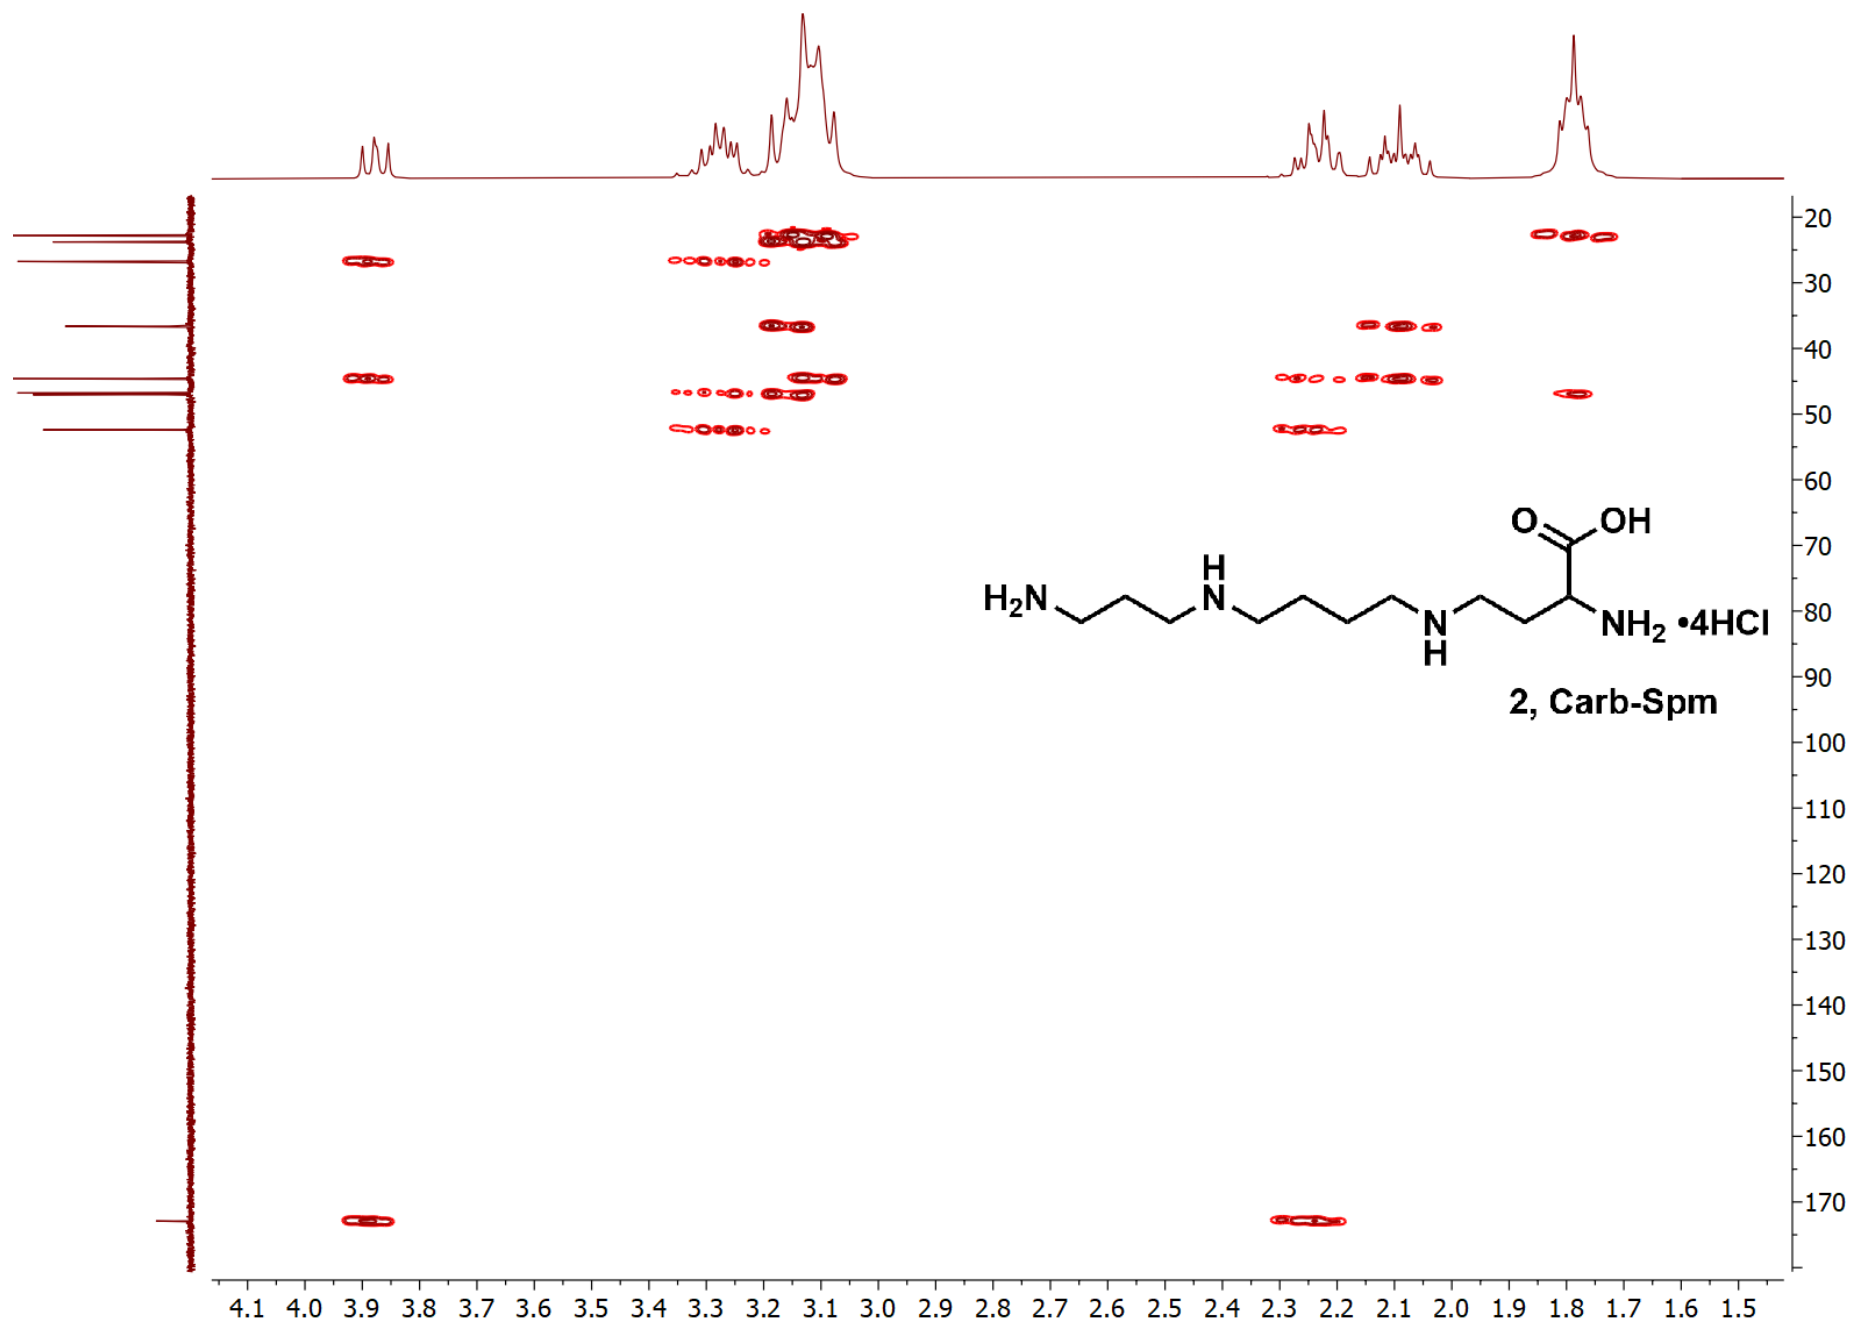

Figure S10. HMBC spectrum of Carb-Spm, 2.

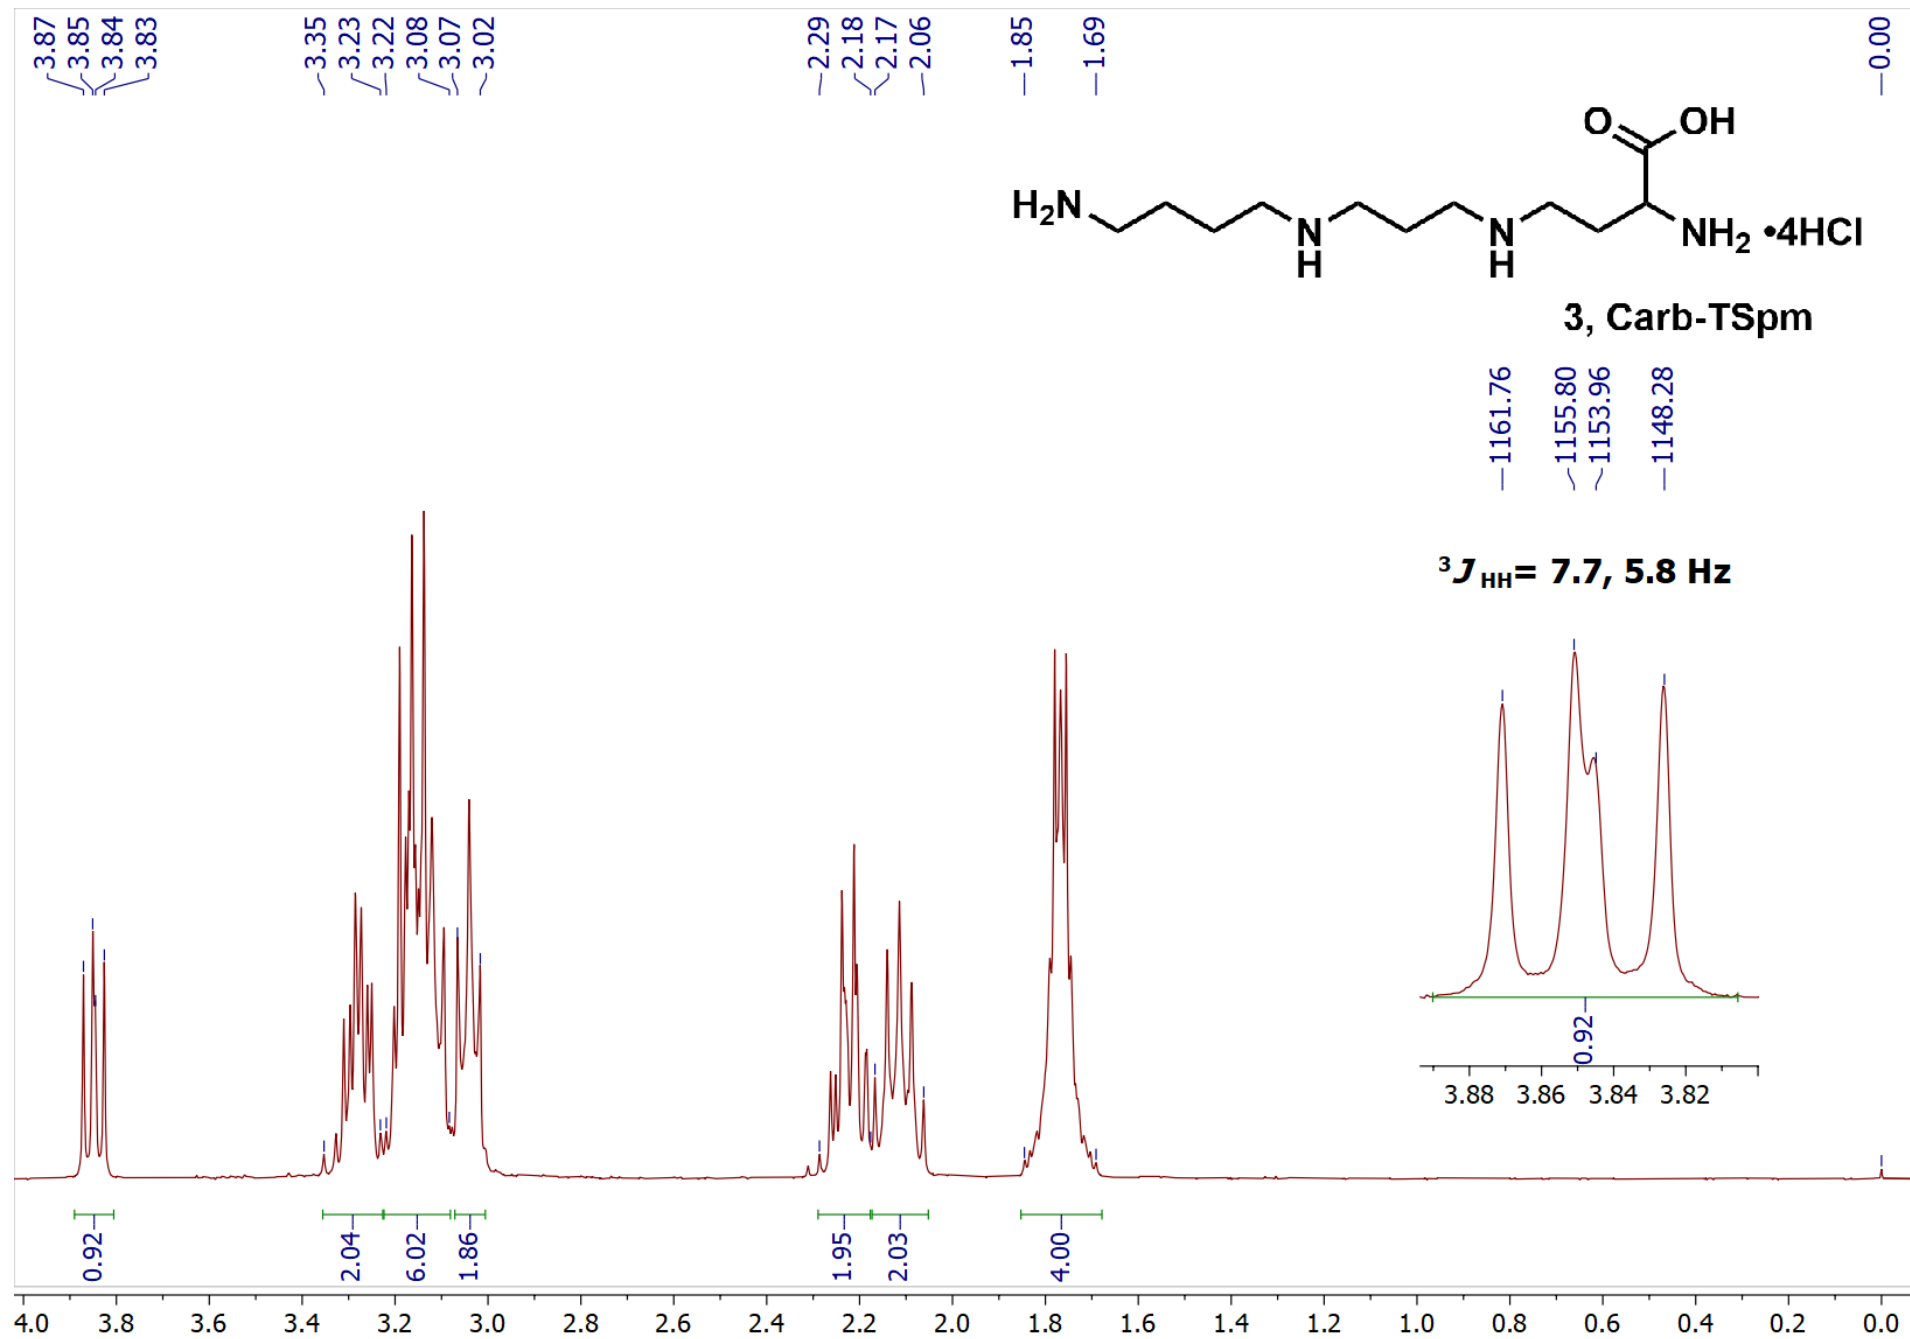

Figure S11.  $^1\text{H}$  NMR spectrum of Carb-TSpm, **3**.



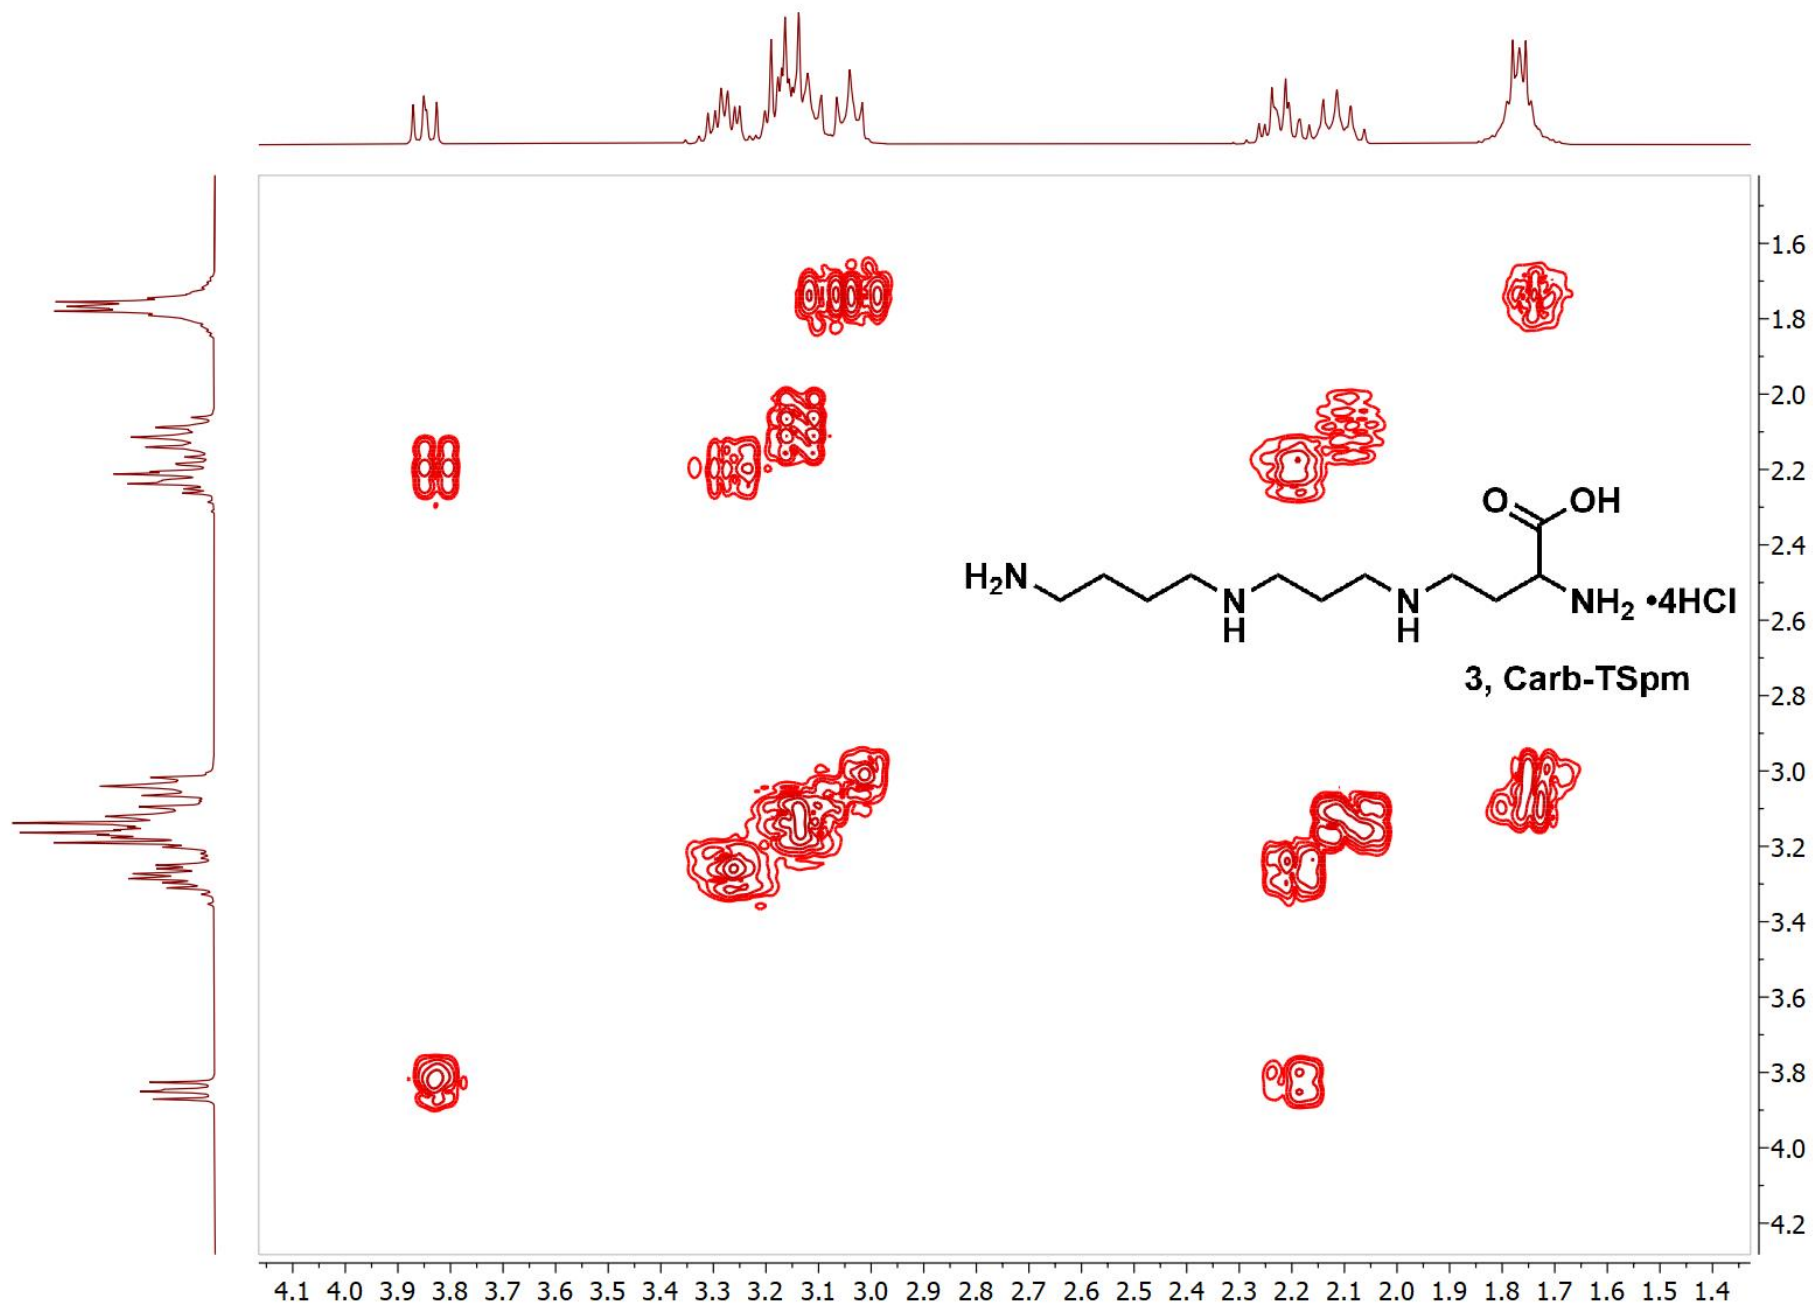

**Figure S13.** COSY spectrum of Carb-TSpm, **3**.

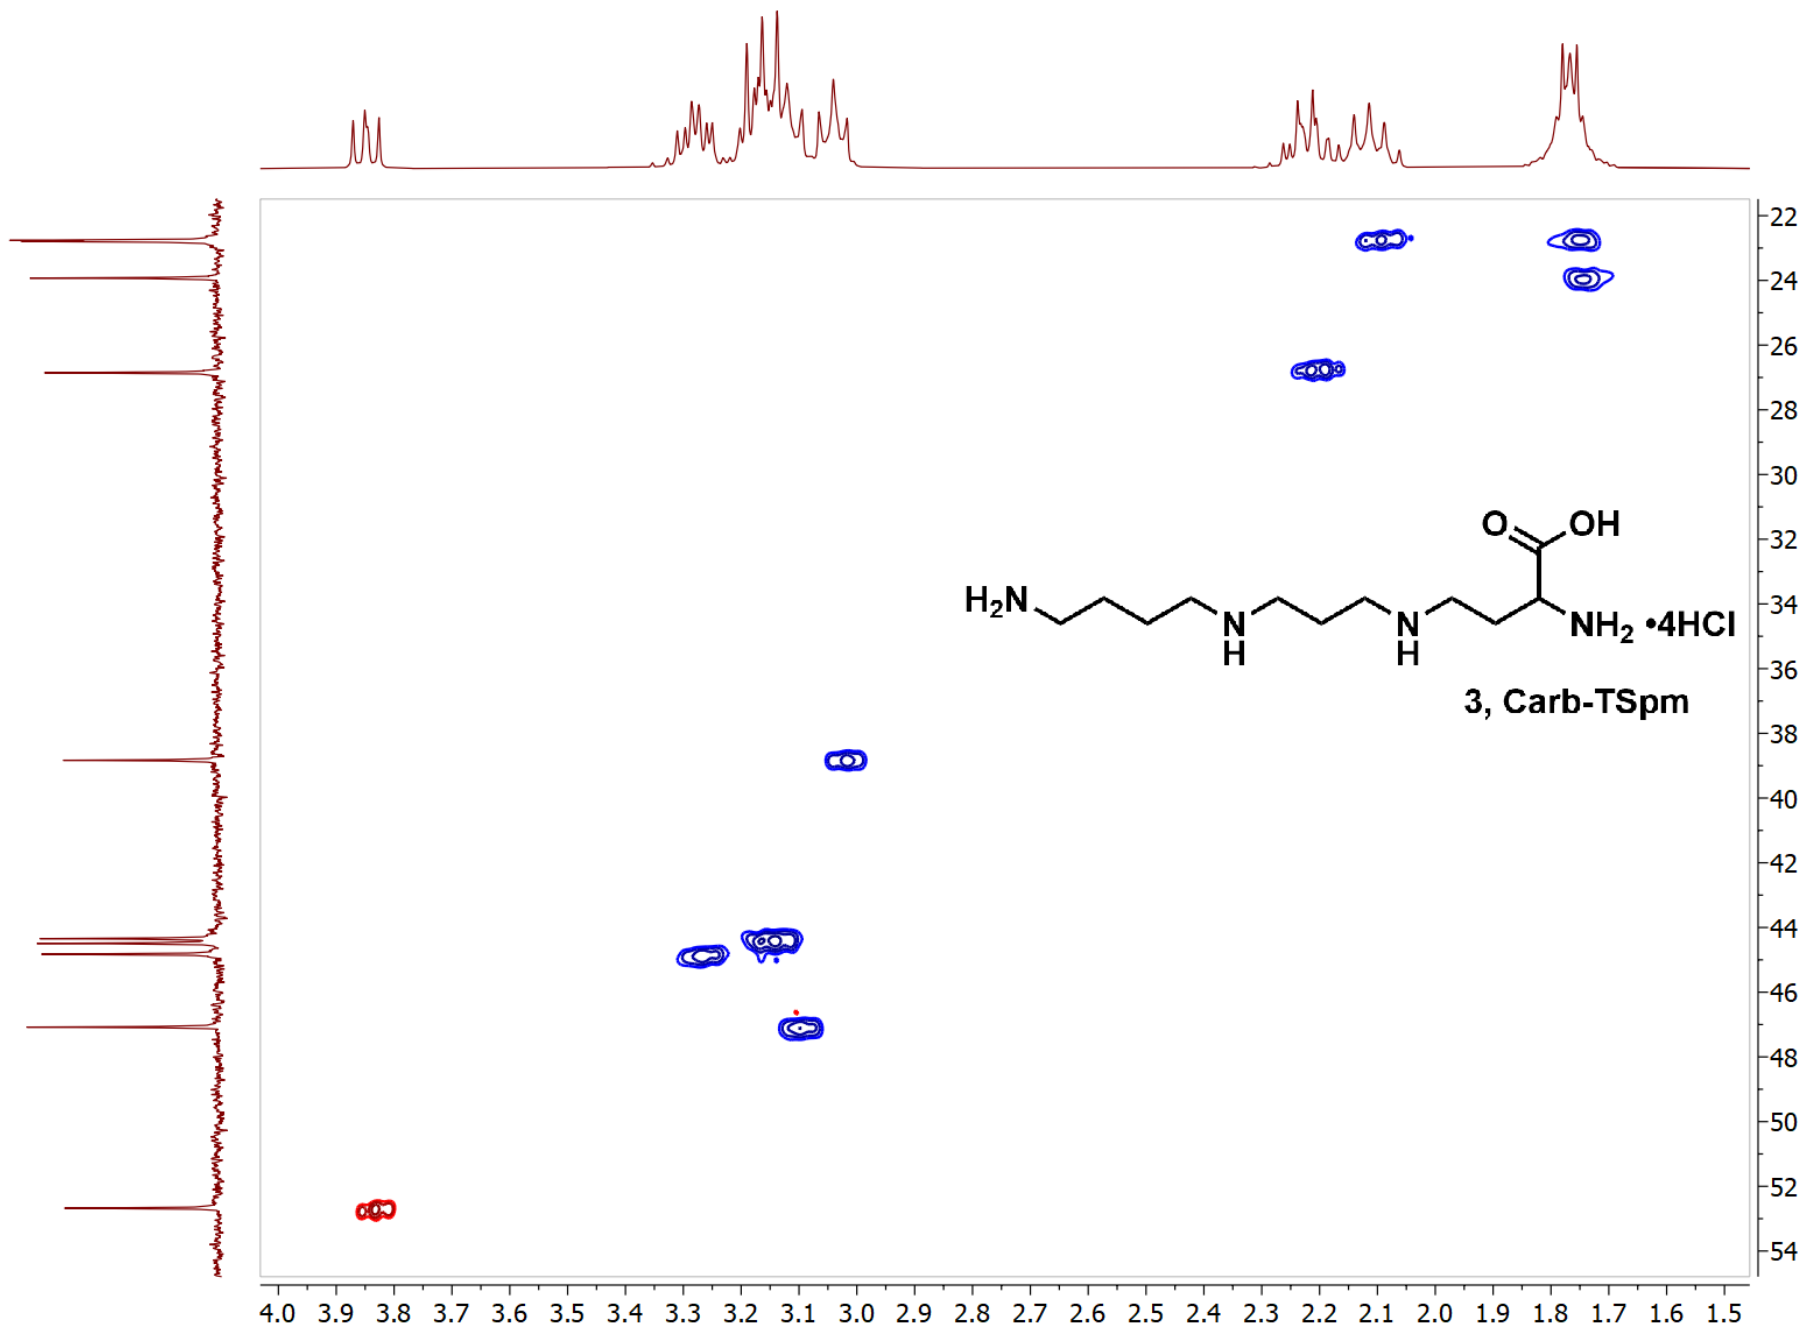

**Figure S14.** HSQC spectrum of Carb-TSpm, **3**.

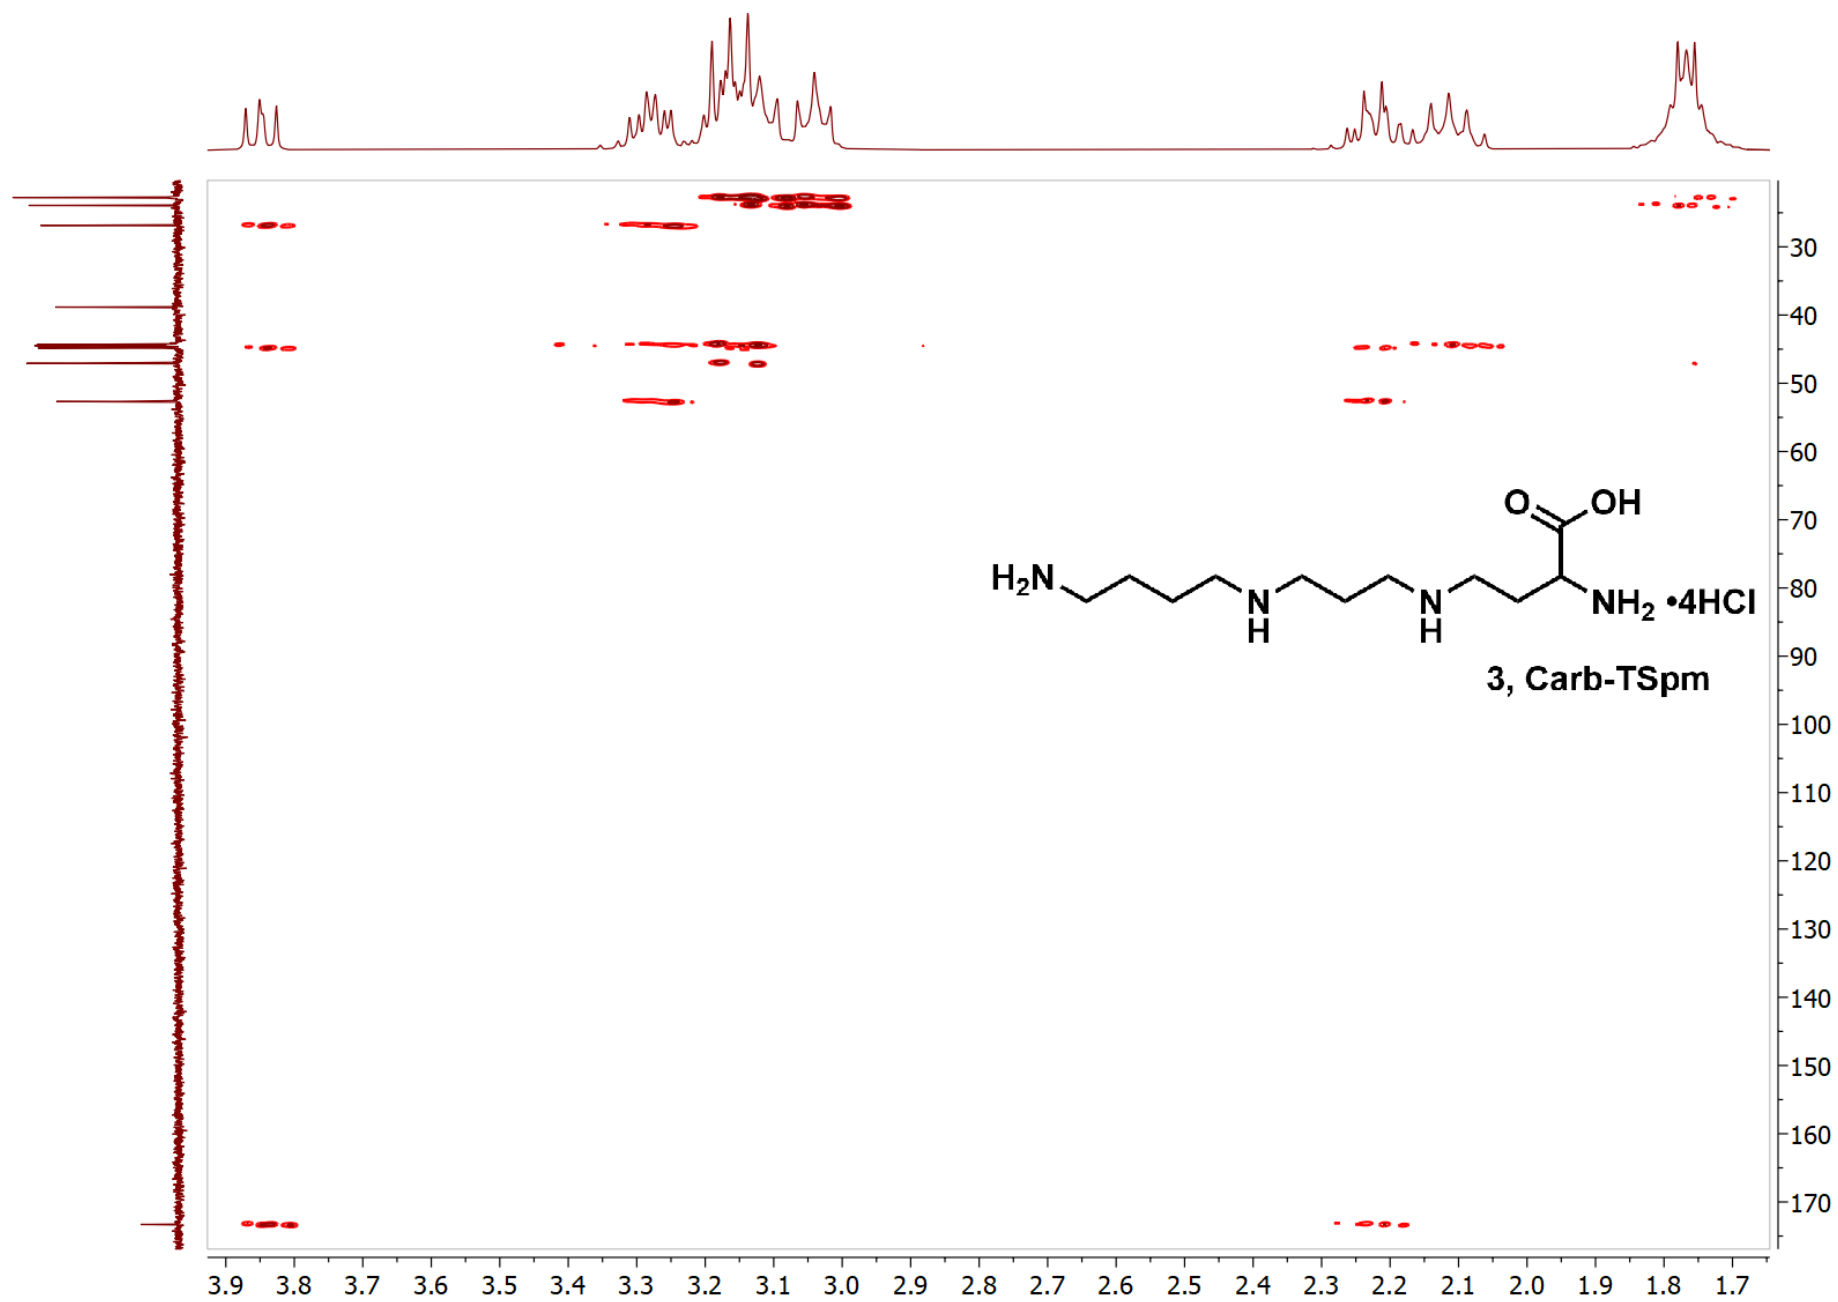

**Figure S15.** HMBC spectrum of Carb-TSpm, **3**.

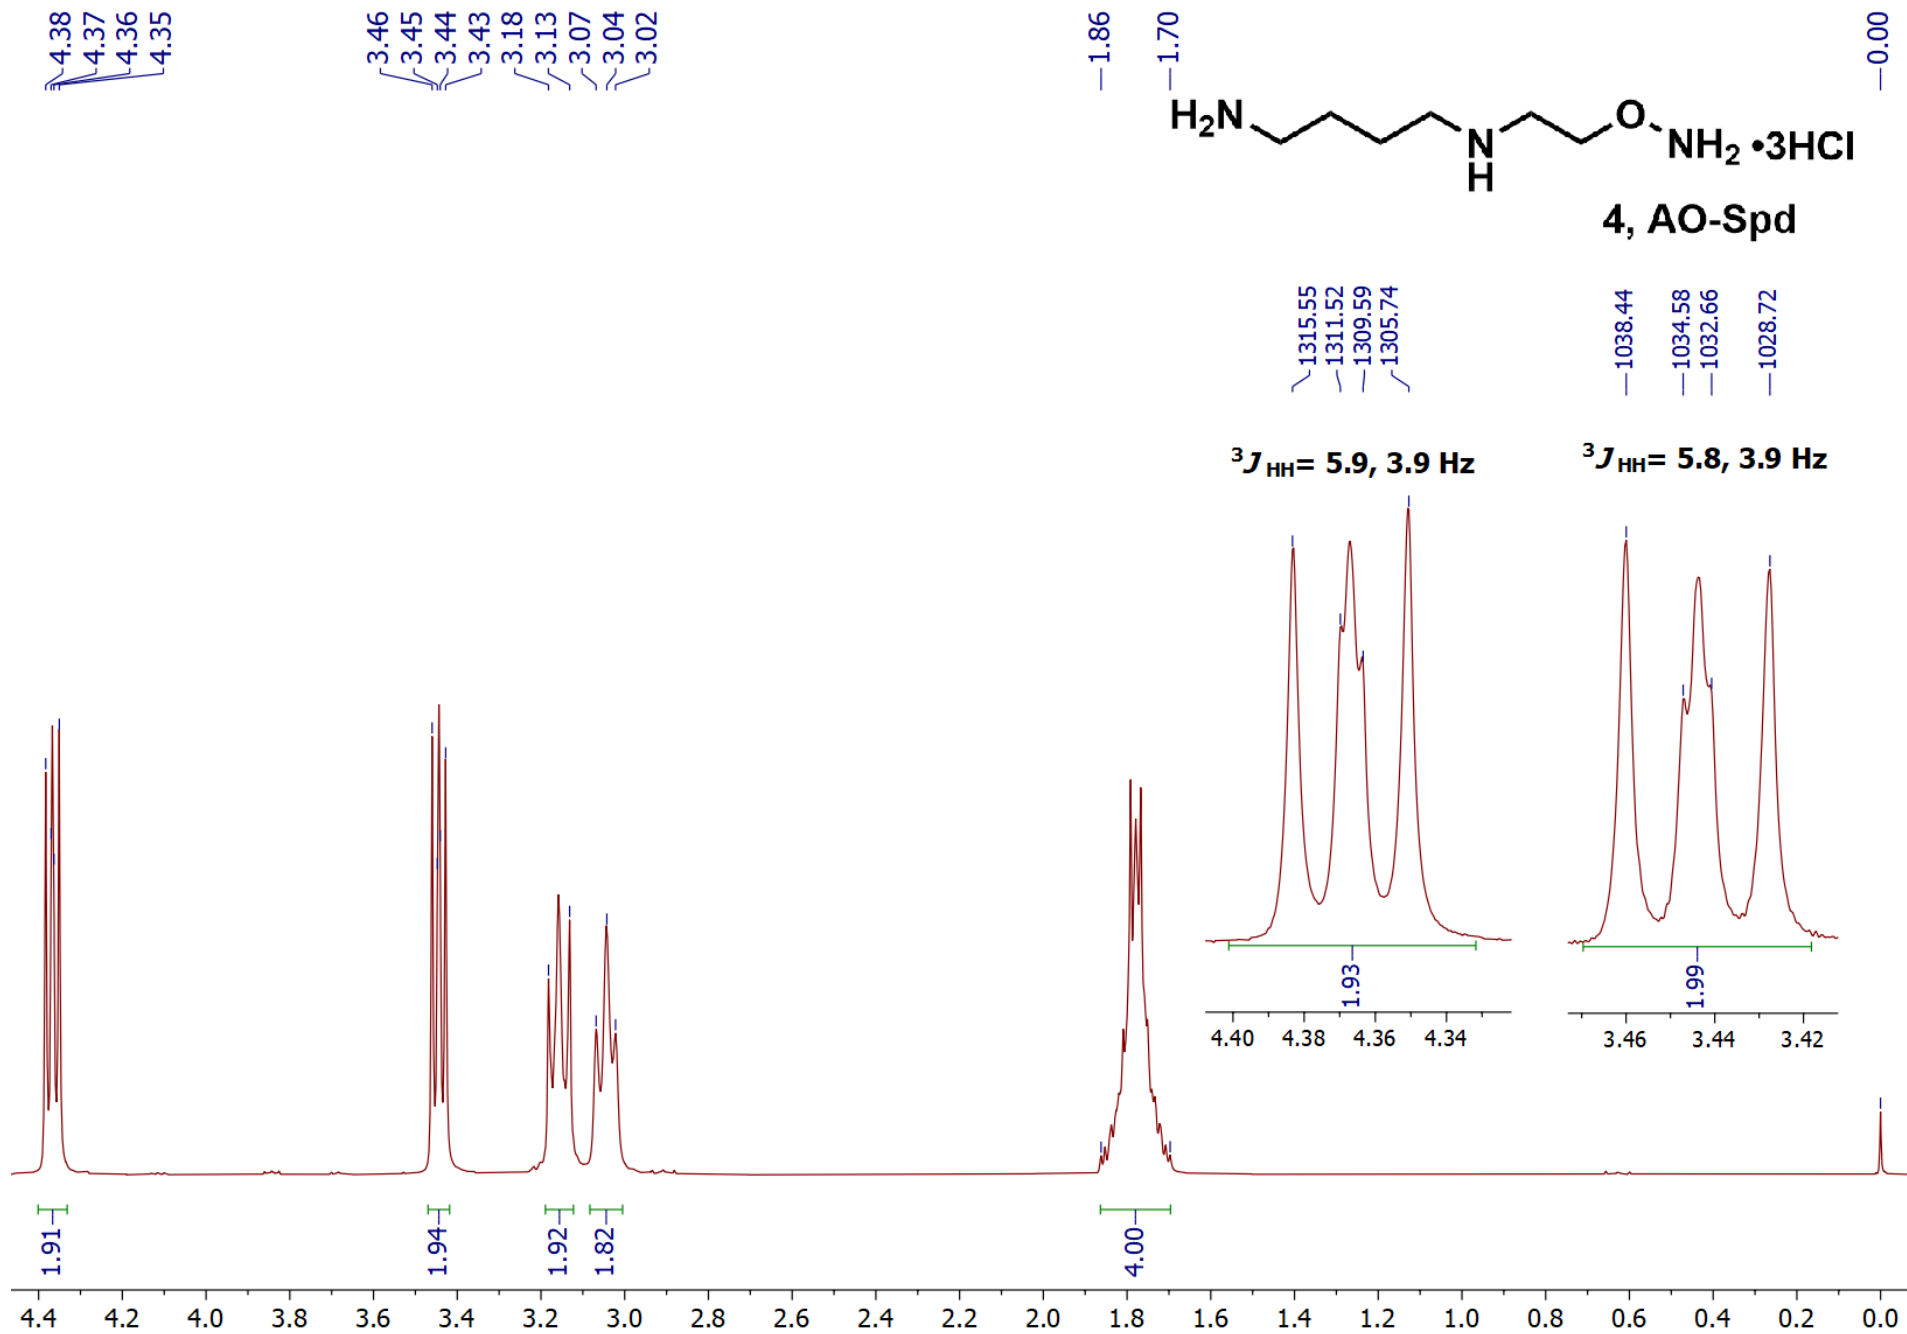

**Figure S16.** <sup>1</sup>H NMR spectrum of AO-Spd, **4**.

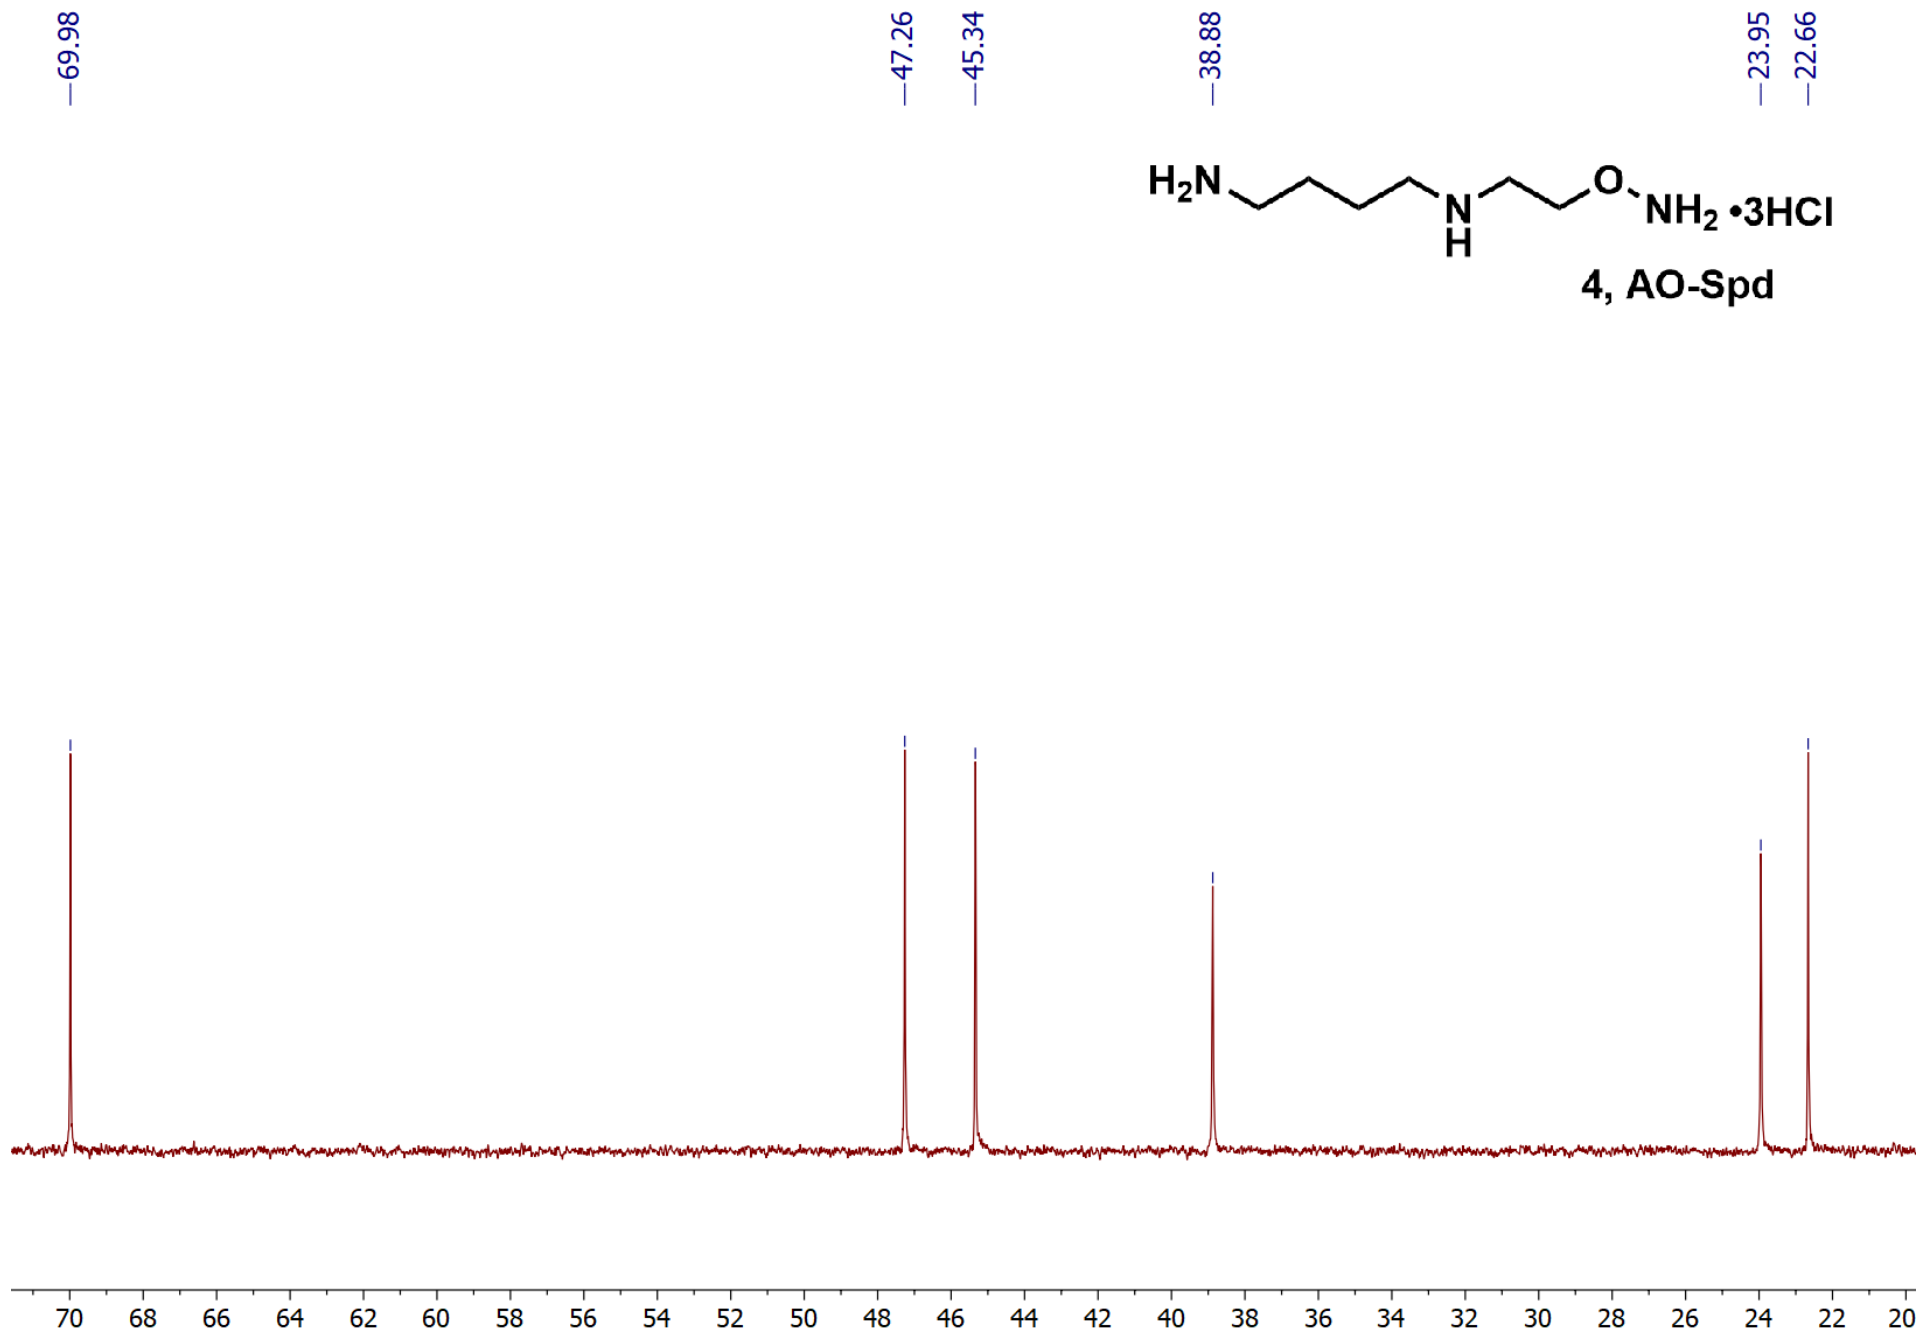

Figure S17.  $^{13}\text{C}$  NMR spectrum of AO-Spd, 4.

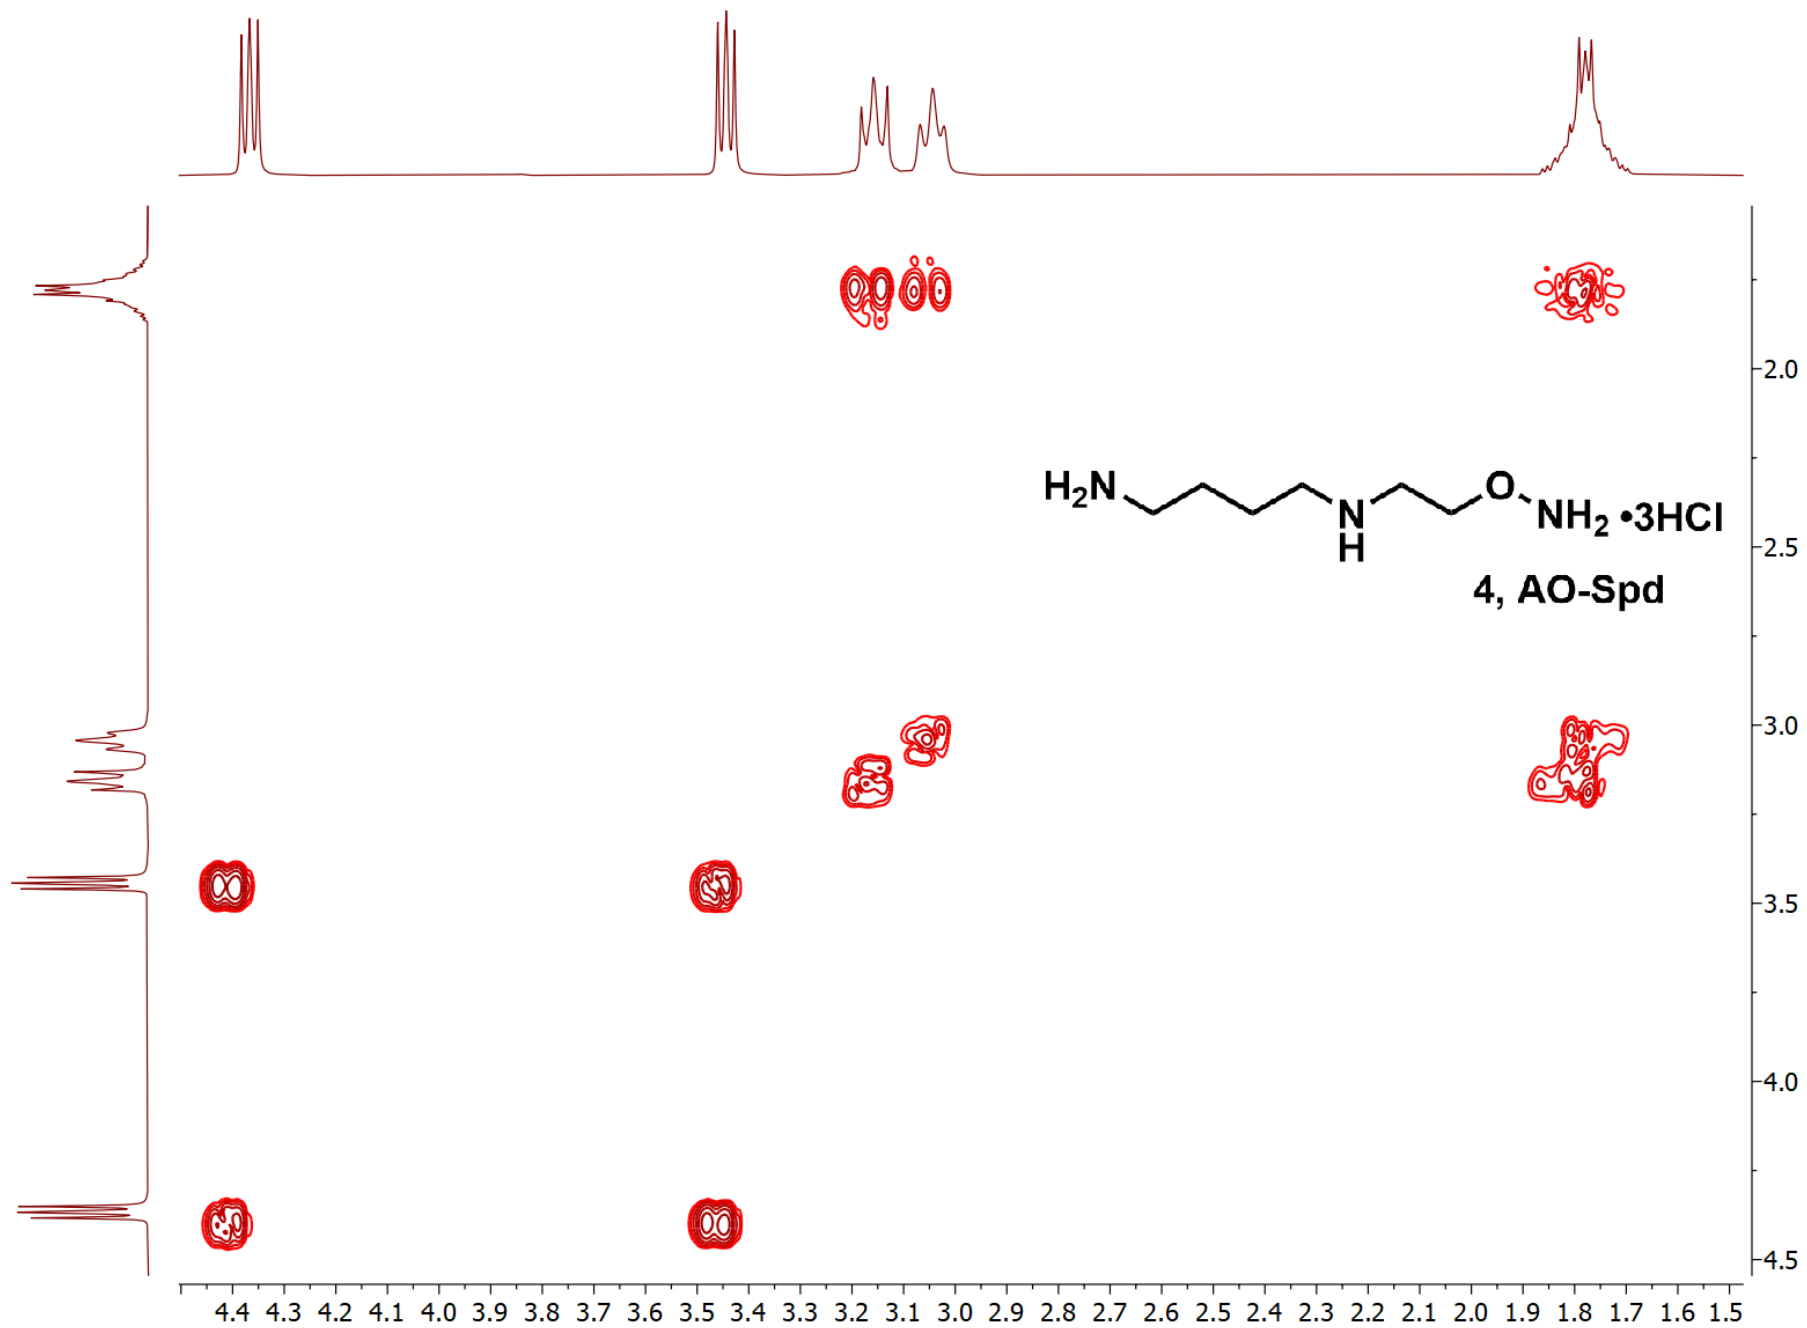

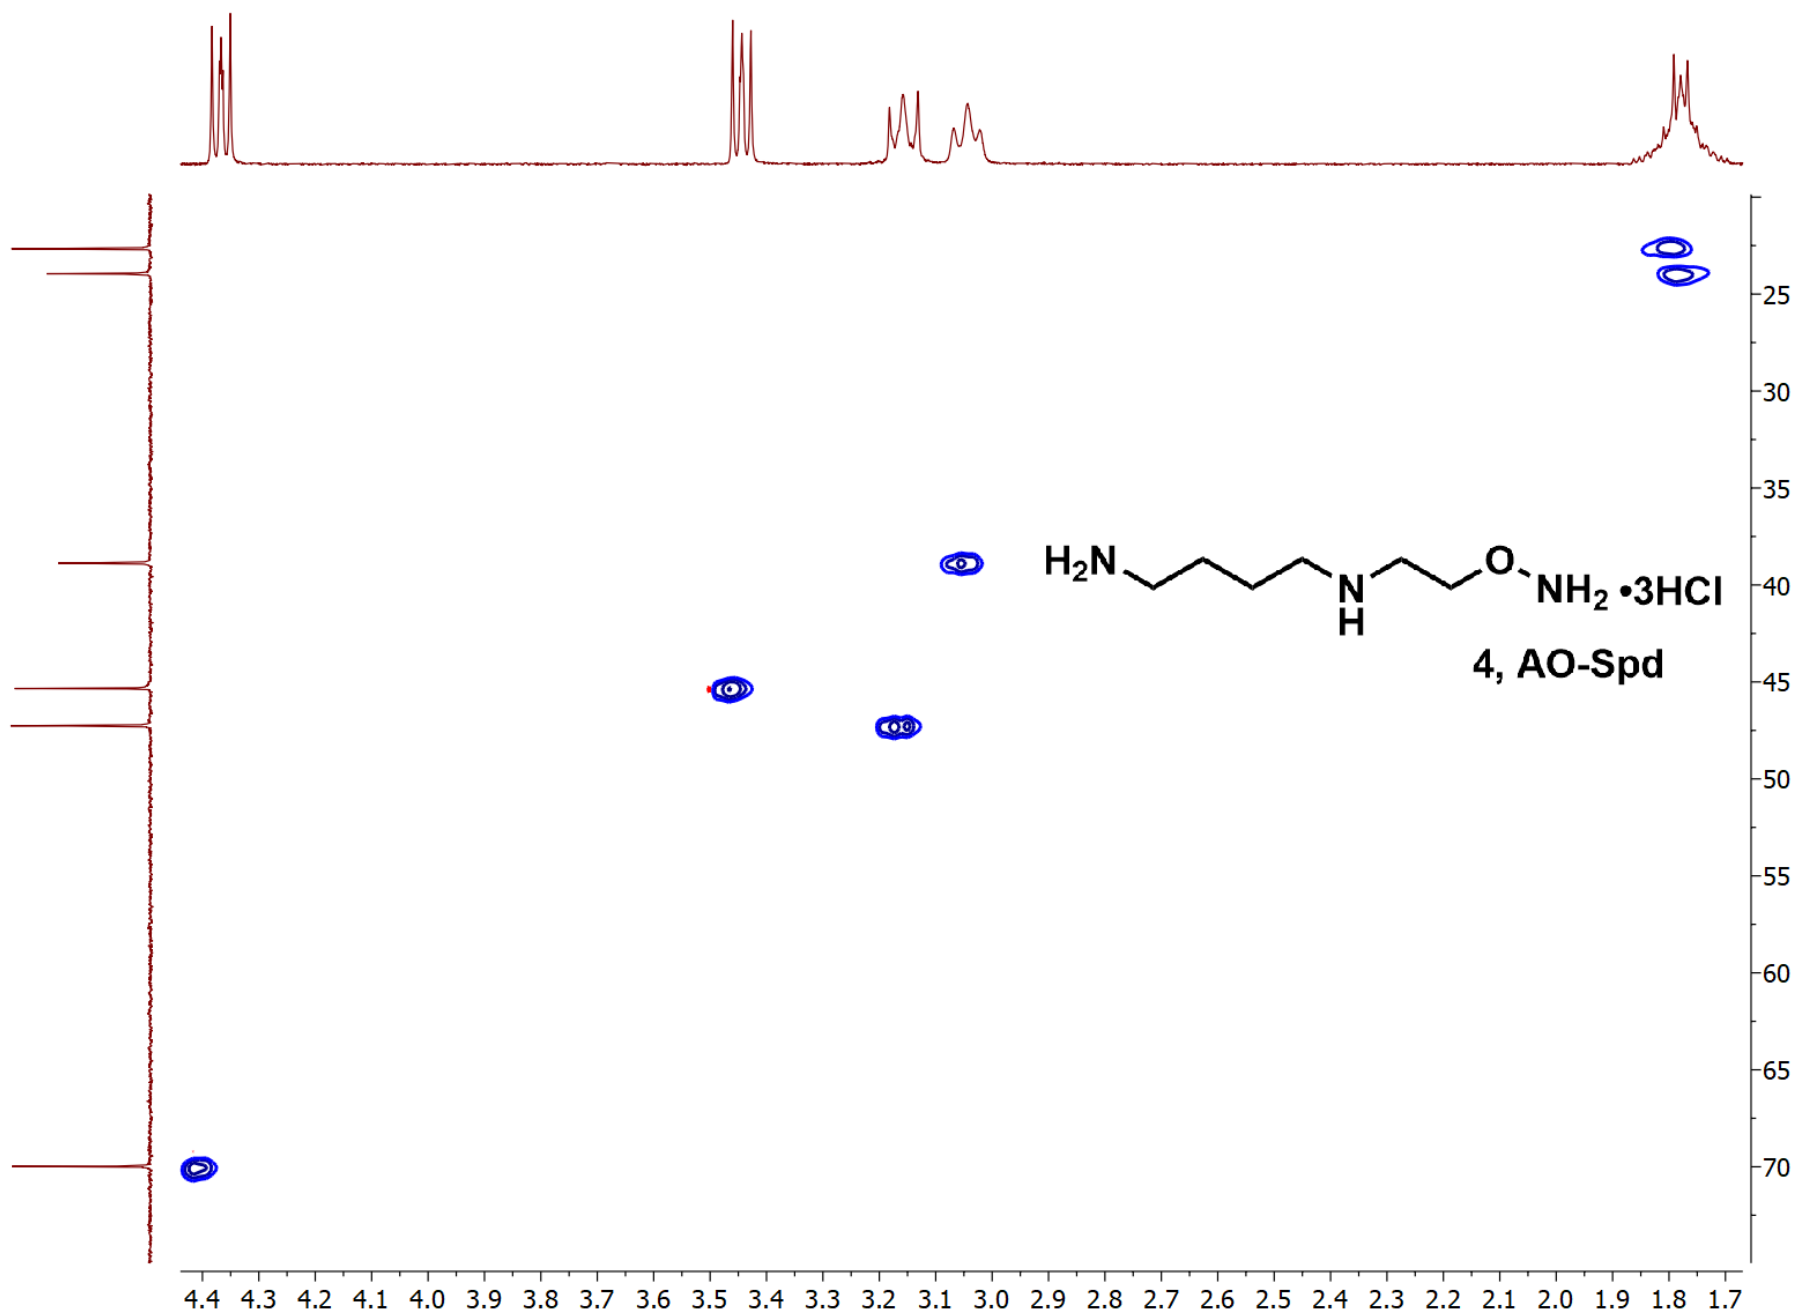

Figure S19. HSQC spectrum of AO-Spd, 4.

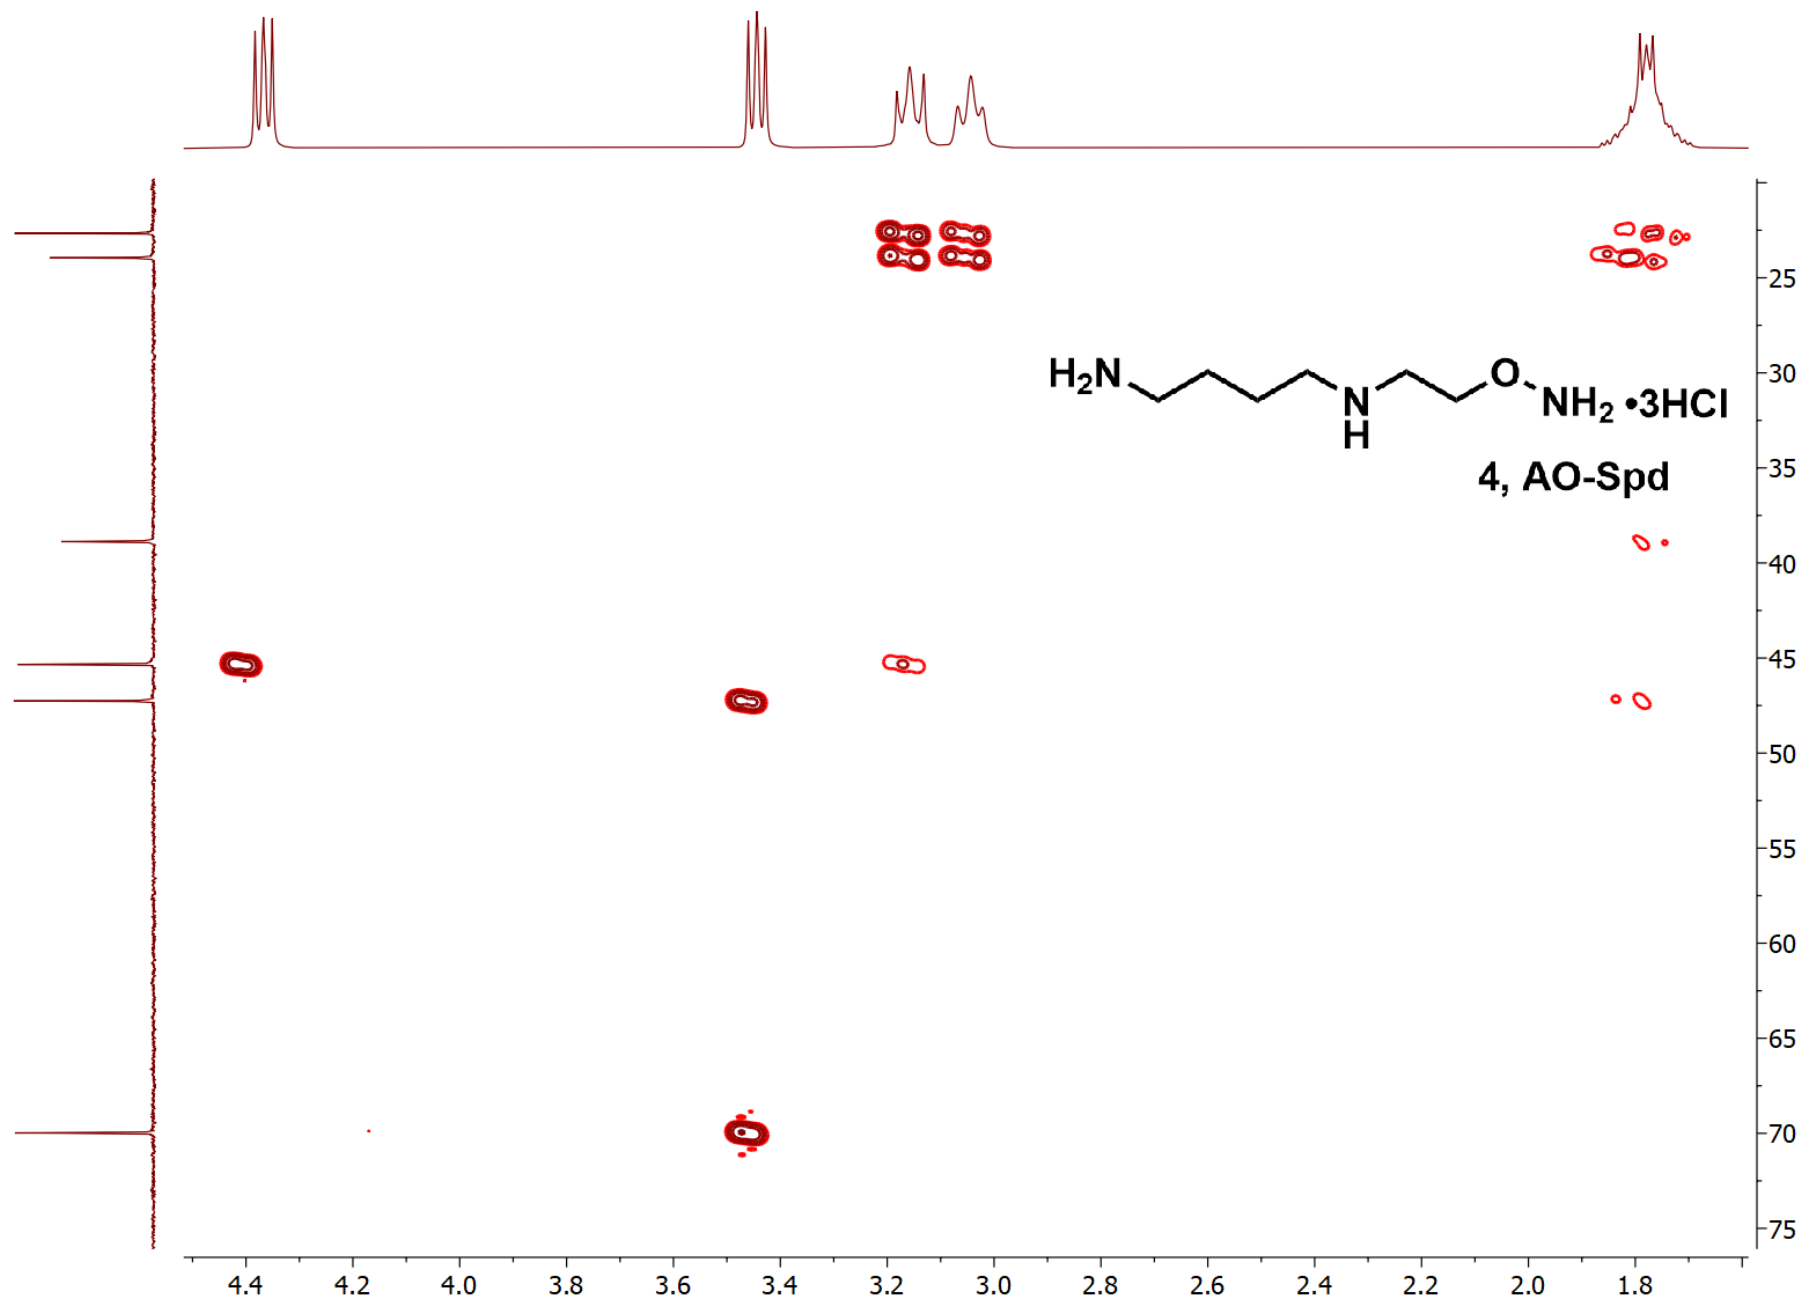

**Figure S20.** HMBC spectrum of AO-Spd, **4**.

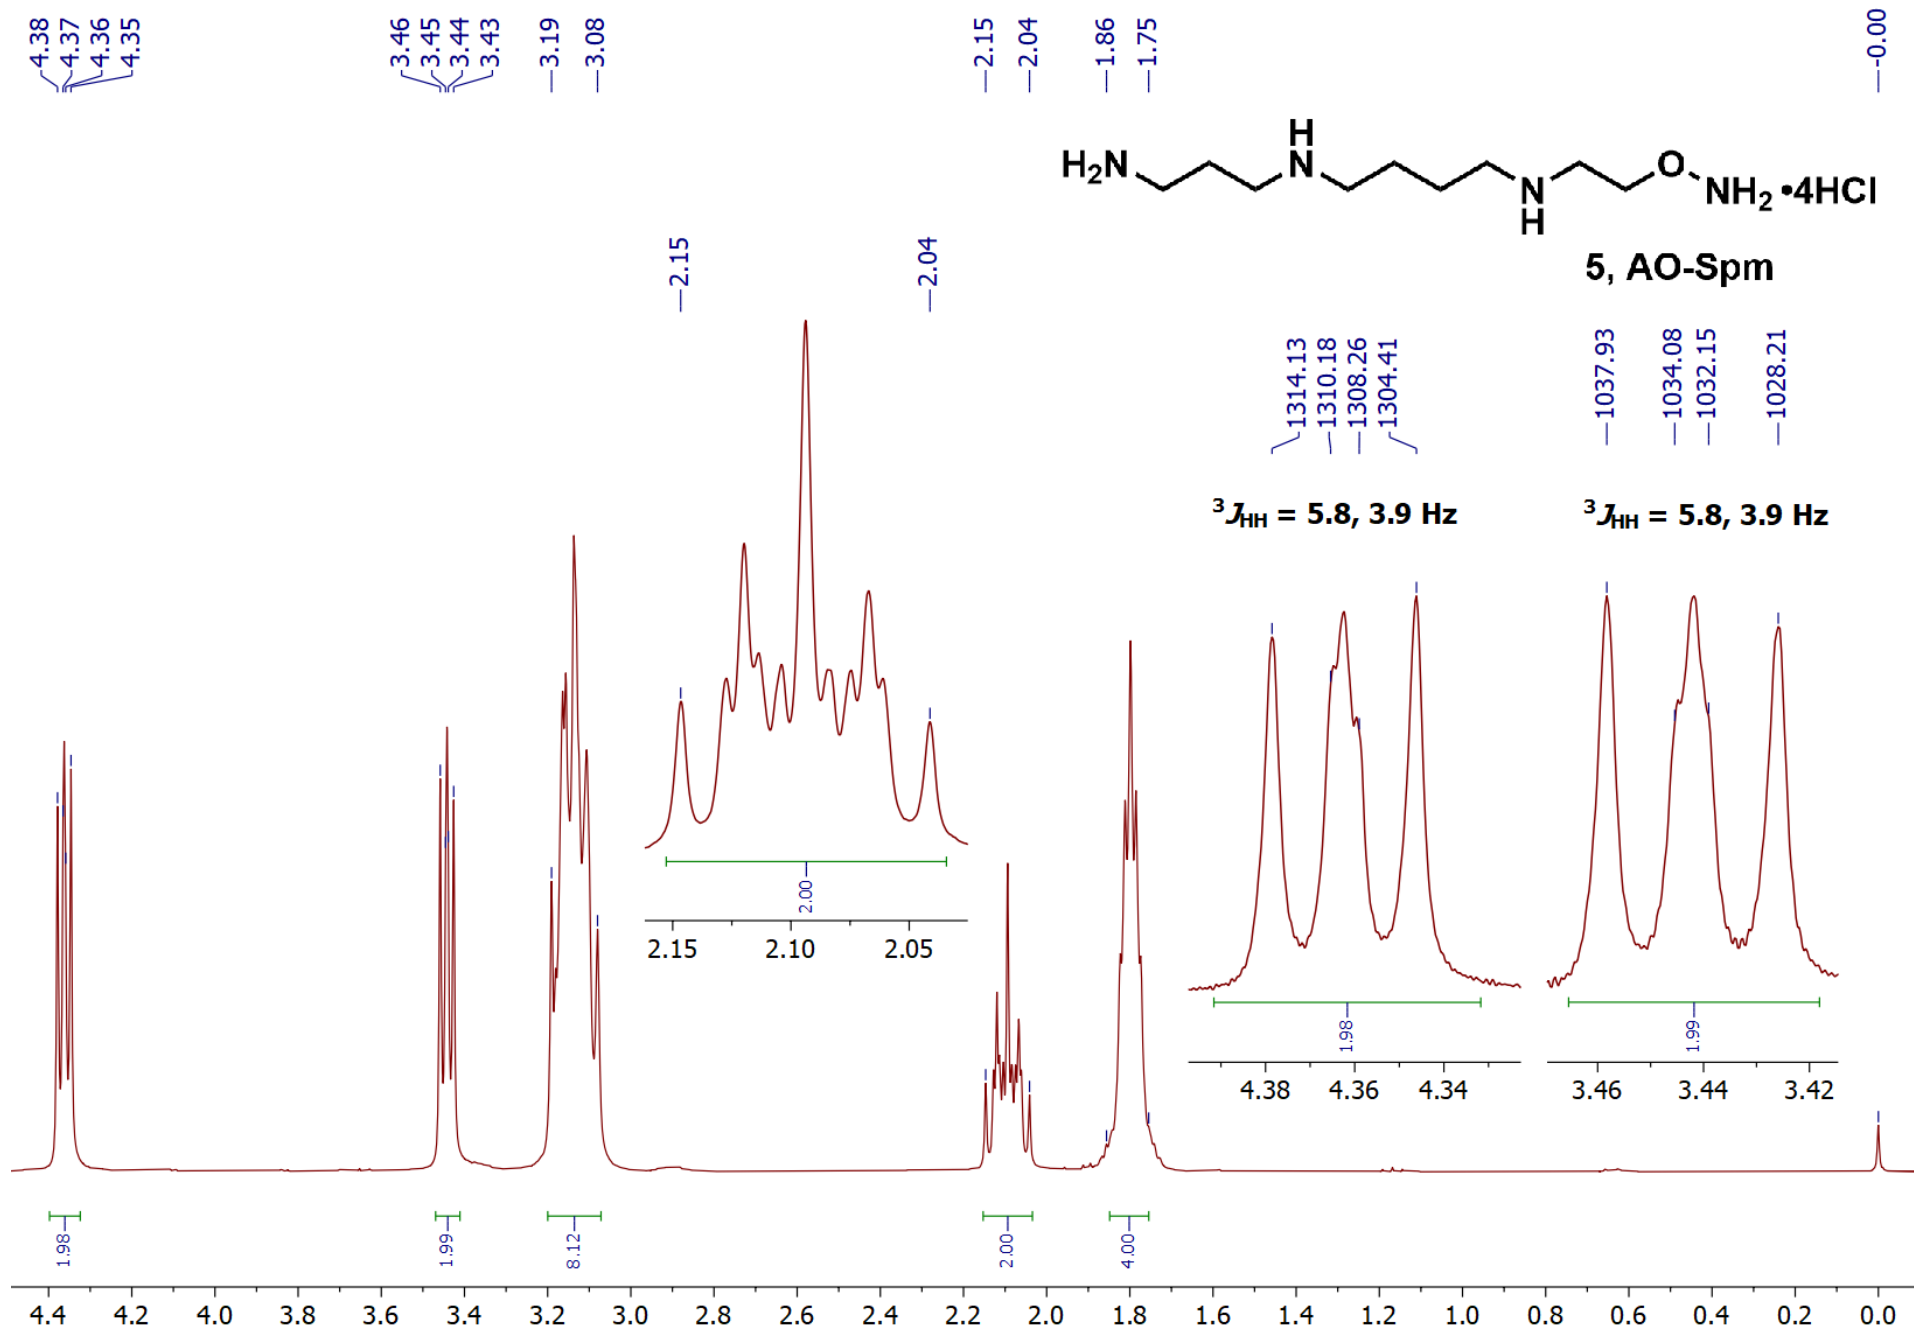

**Figure S21.**  $^1\text{H}$  NMR spectrum of AO-Spm, **5**.

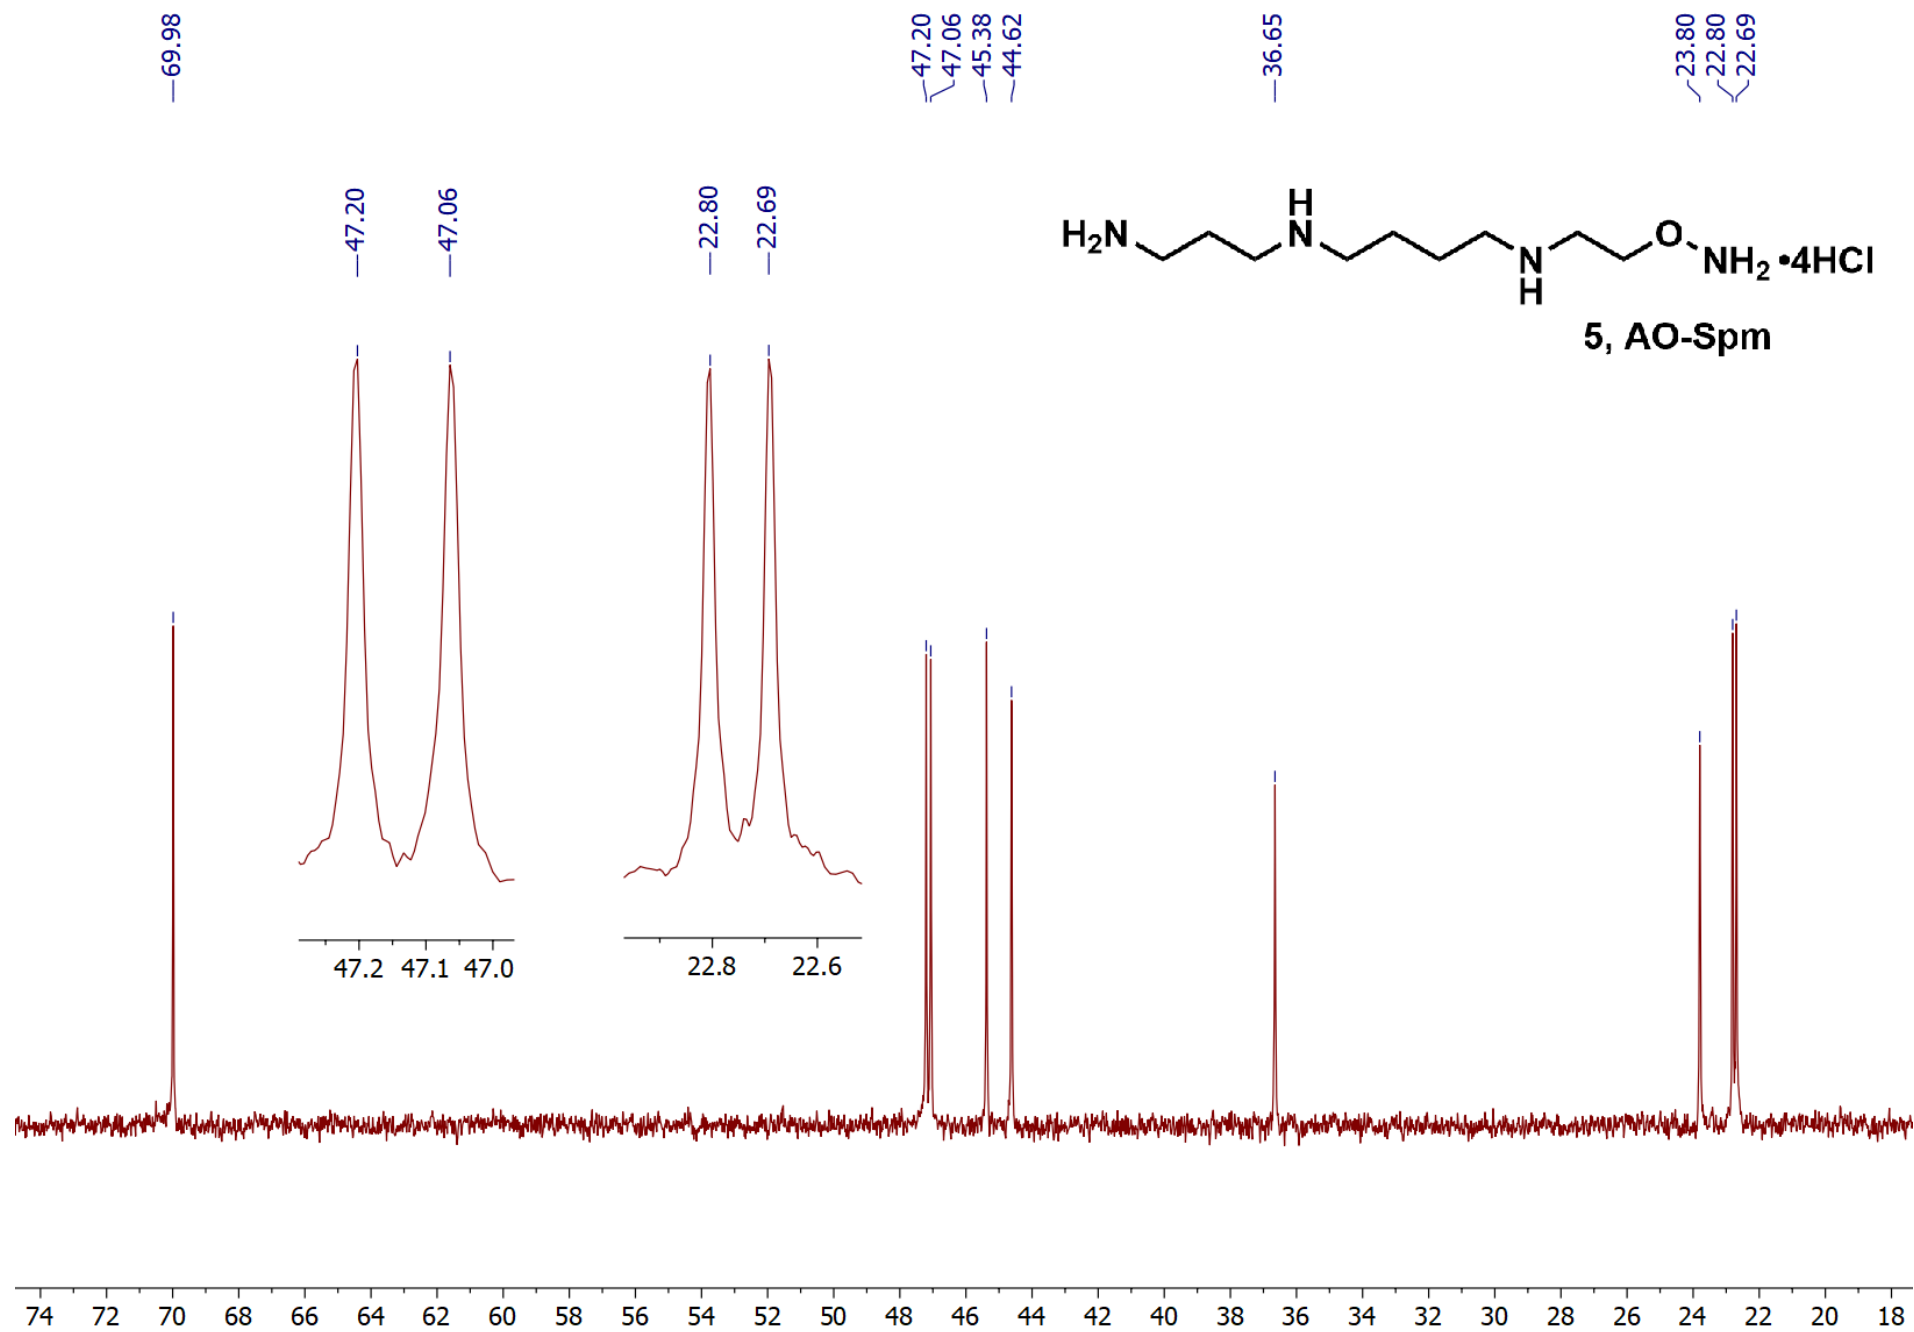

**Figure S22.** <sup>13</sup>C NMR spectrum of AO-Spm, **5**.

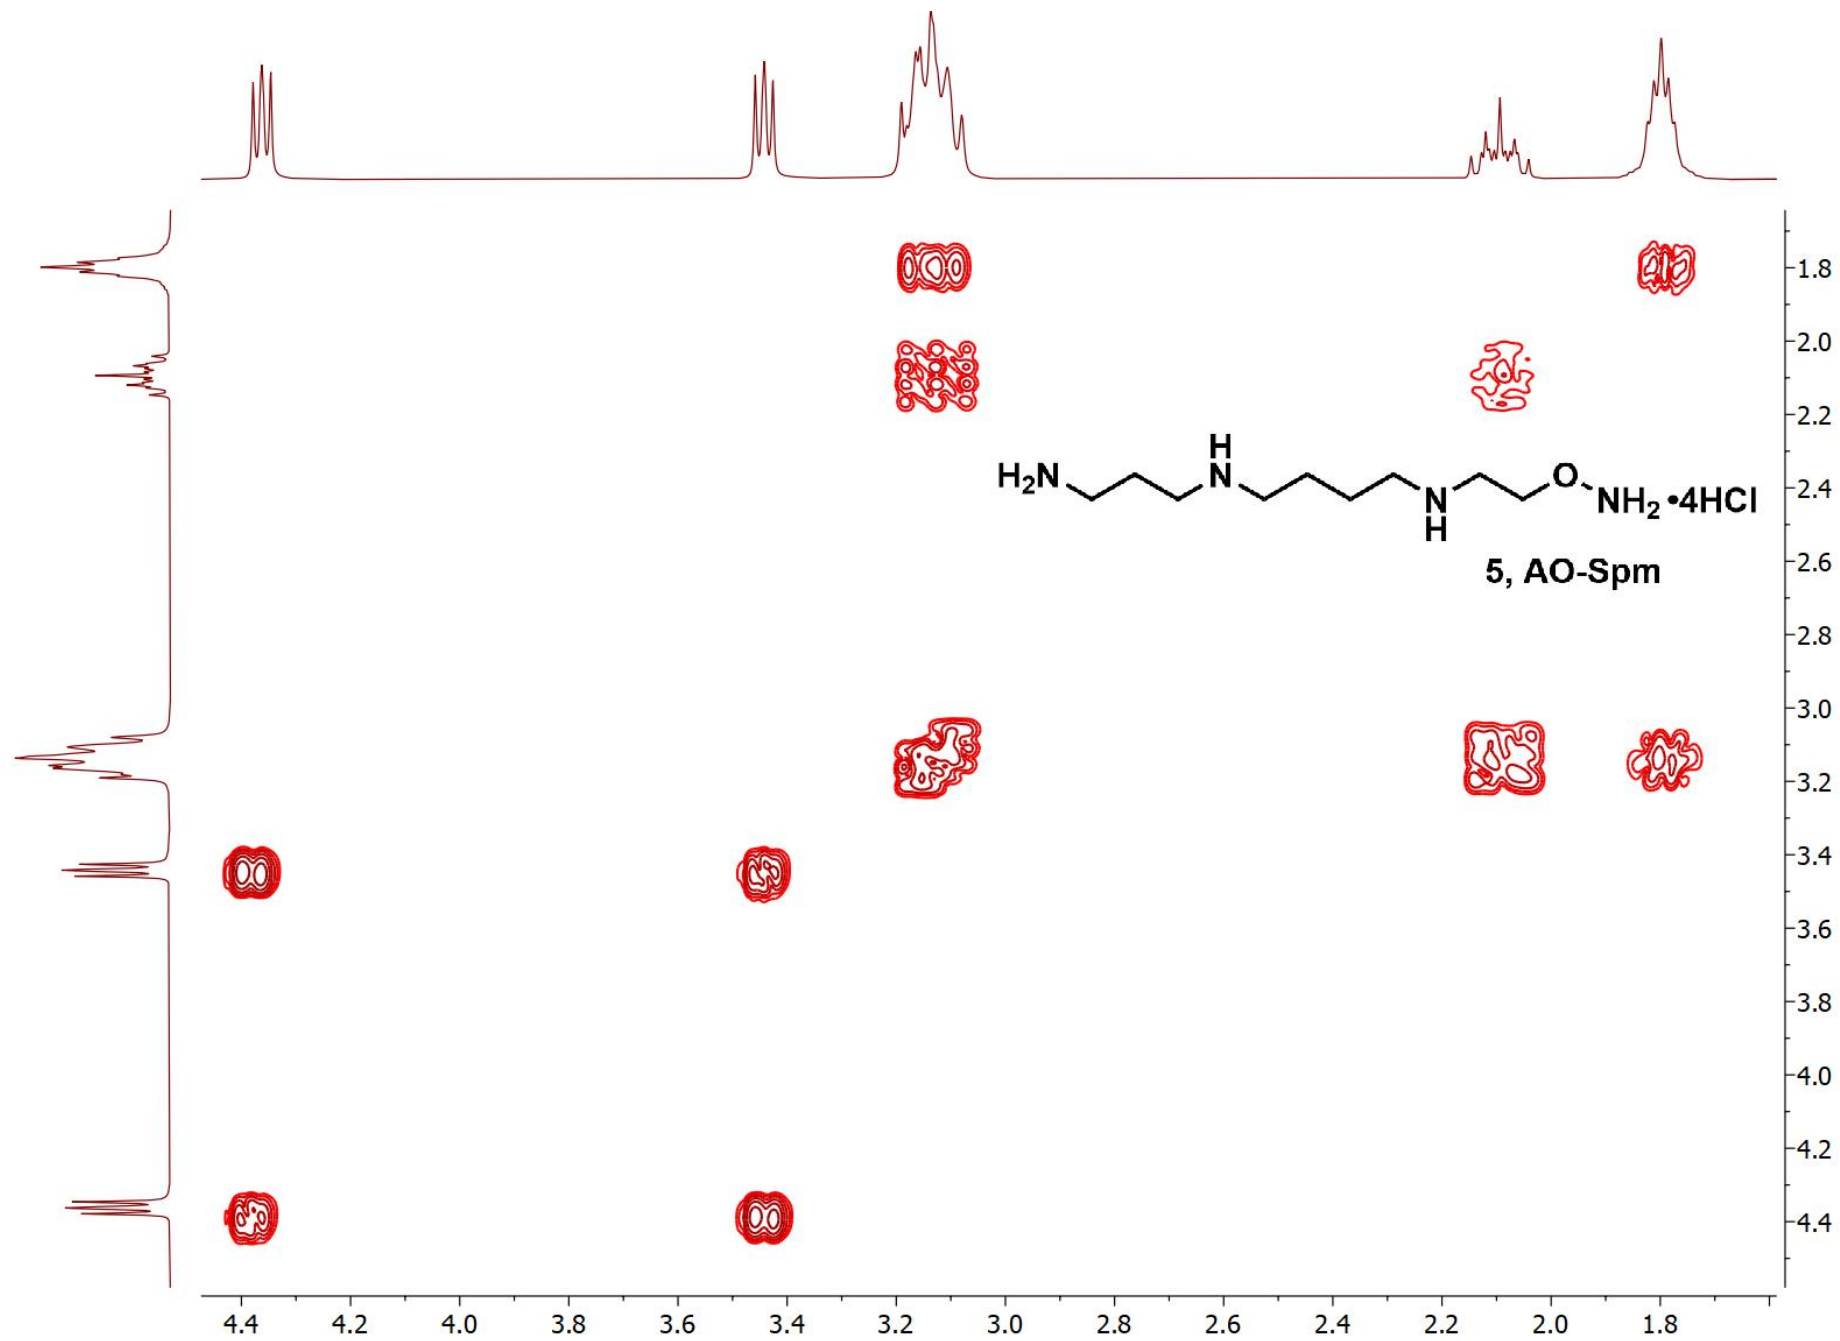

Figure S23. COSY spectrum of AO-Spm, 5.

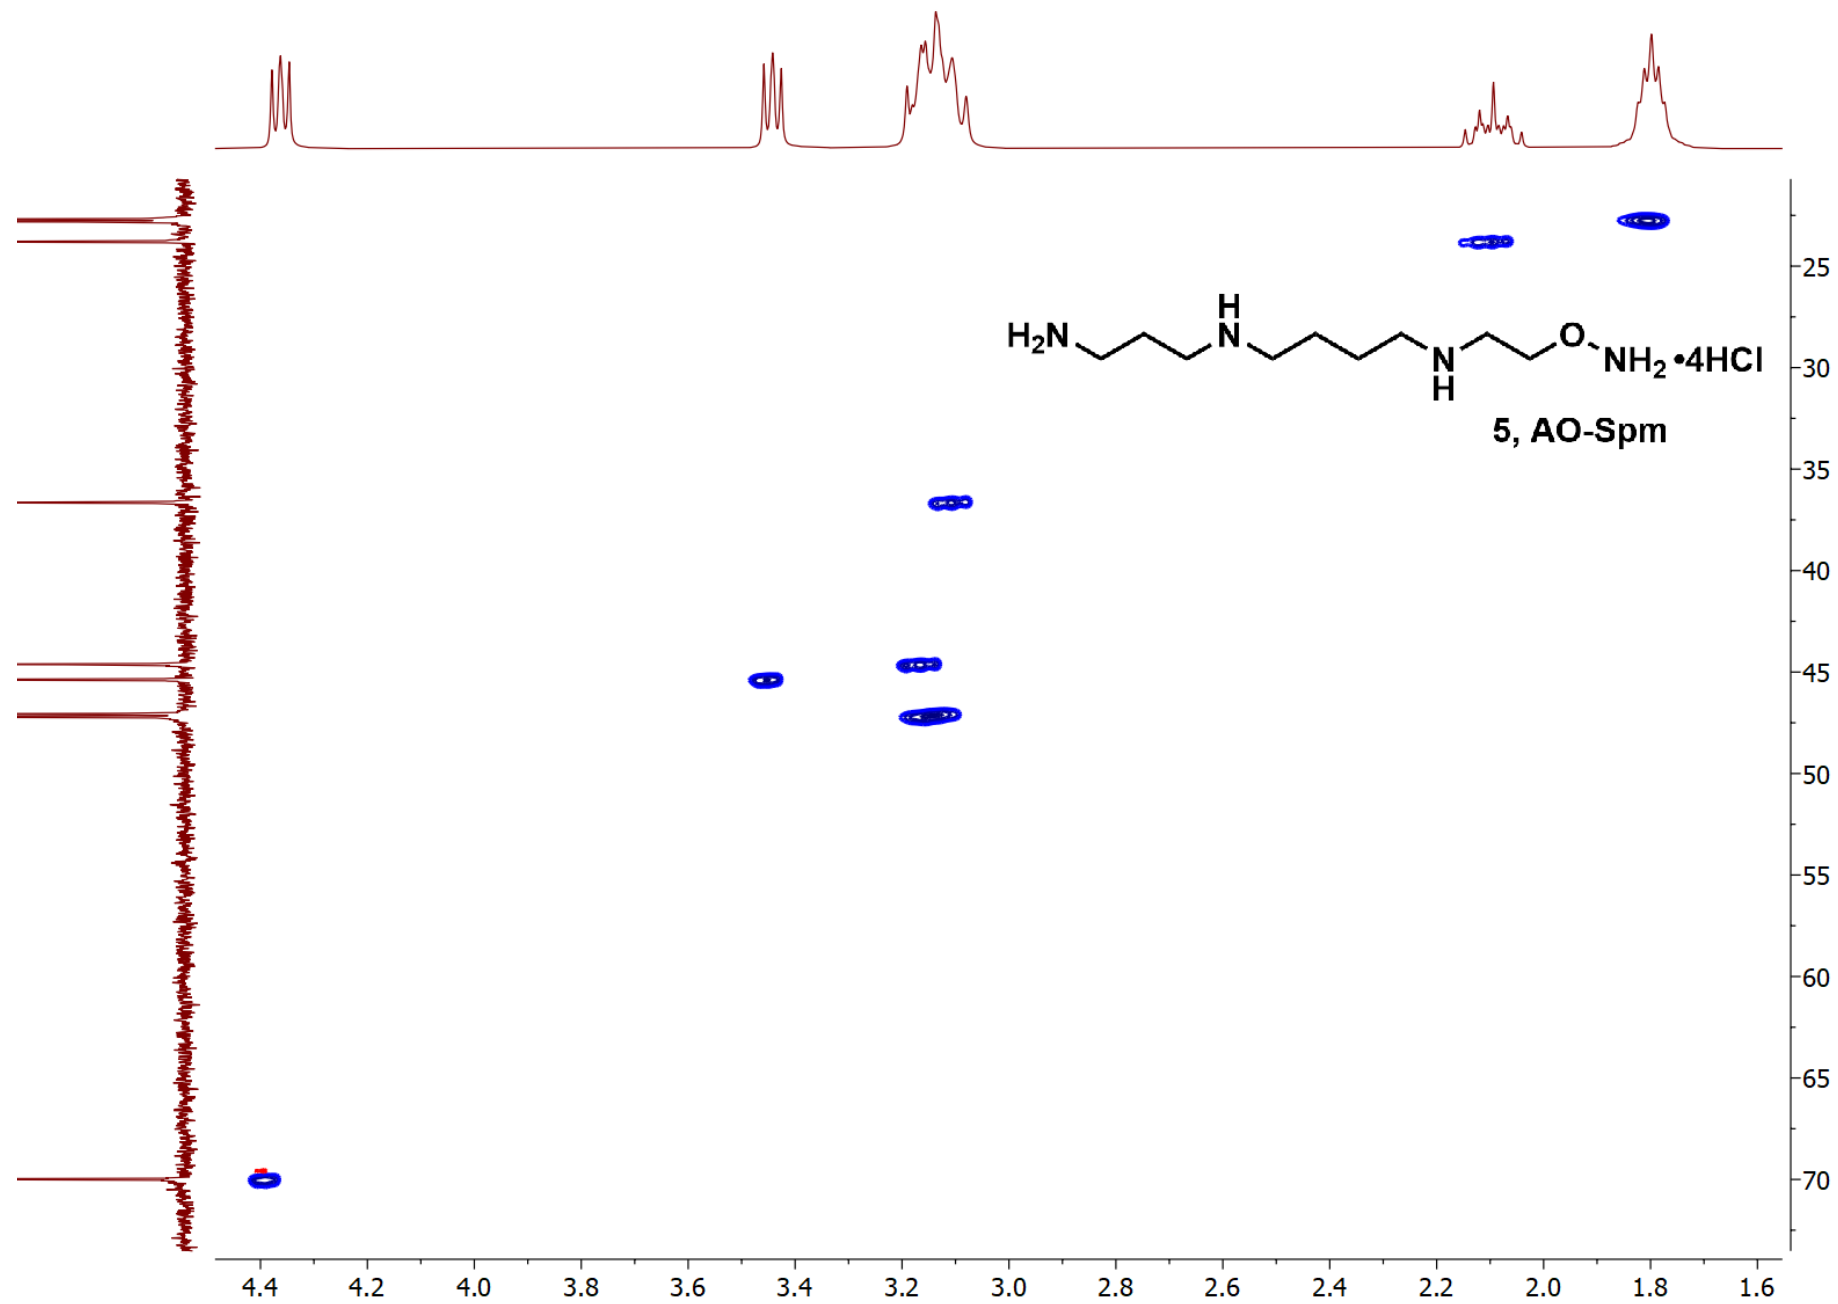

Figure S24. HSQC spectrum of AO-Spm, 5.

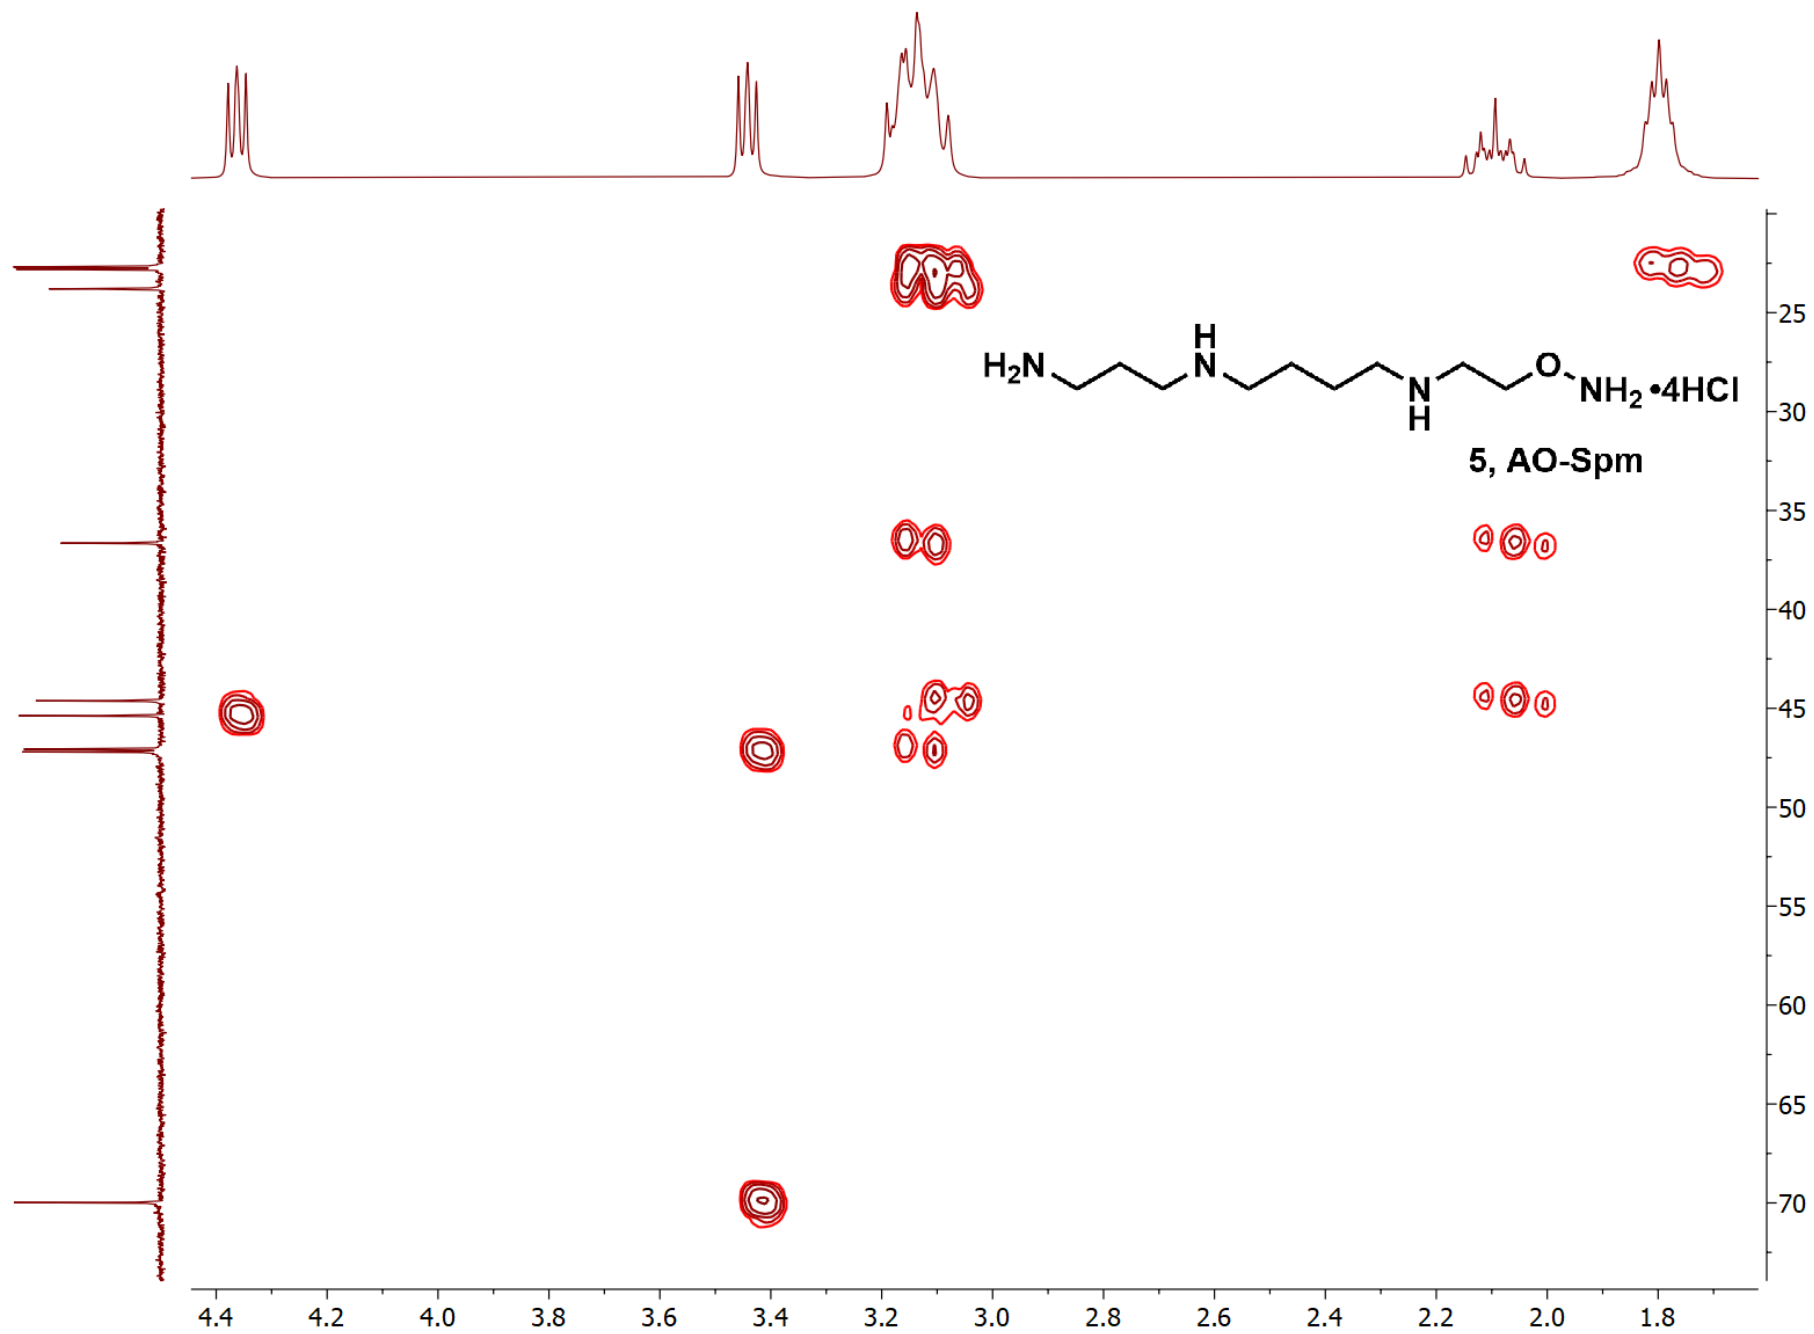

Figure S25. HMBC spectrum of AO-Spm, **5**.

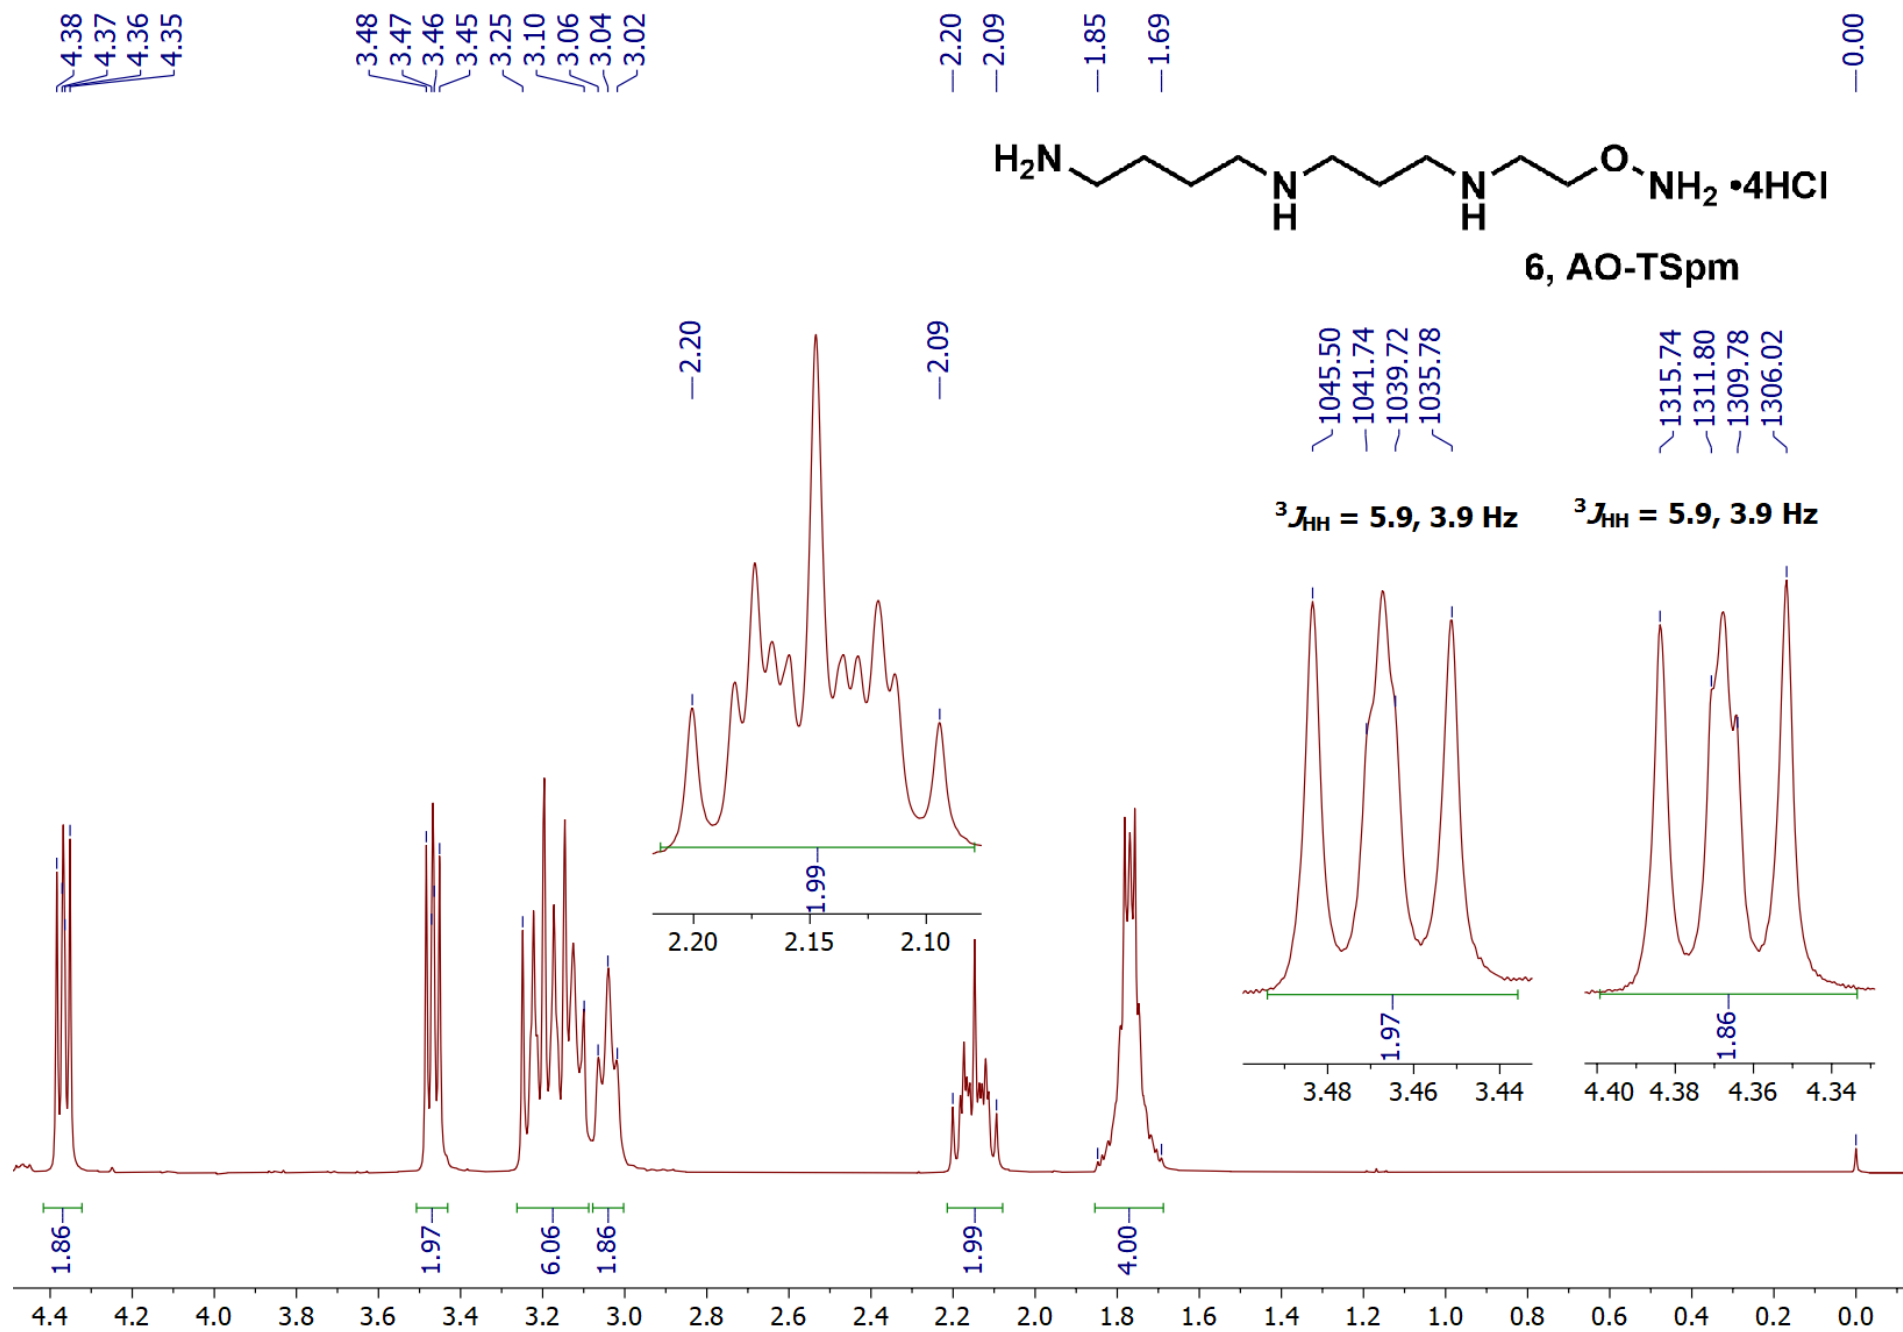

**Figure S26.**  $^1\text{H}$  NMR spectrum of AO-TSpm, **6**.

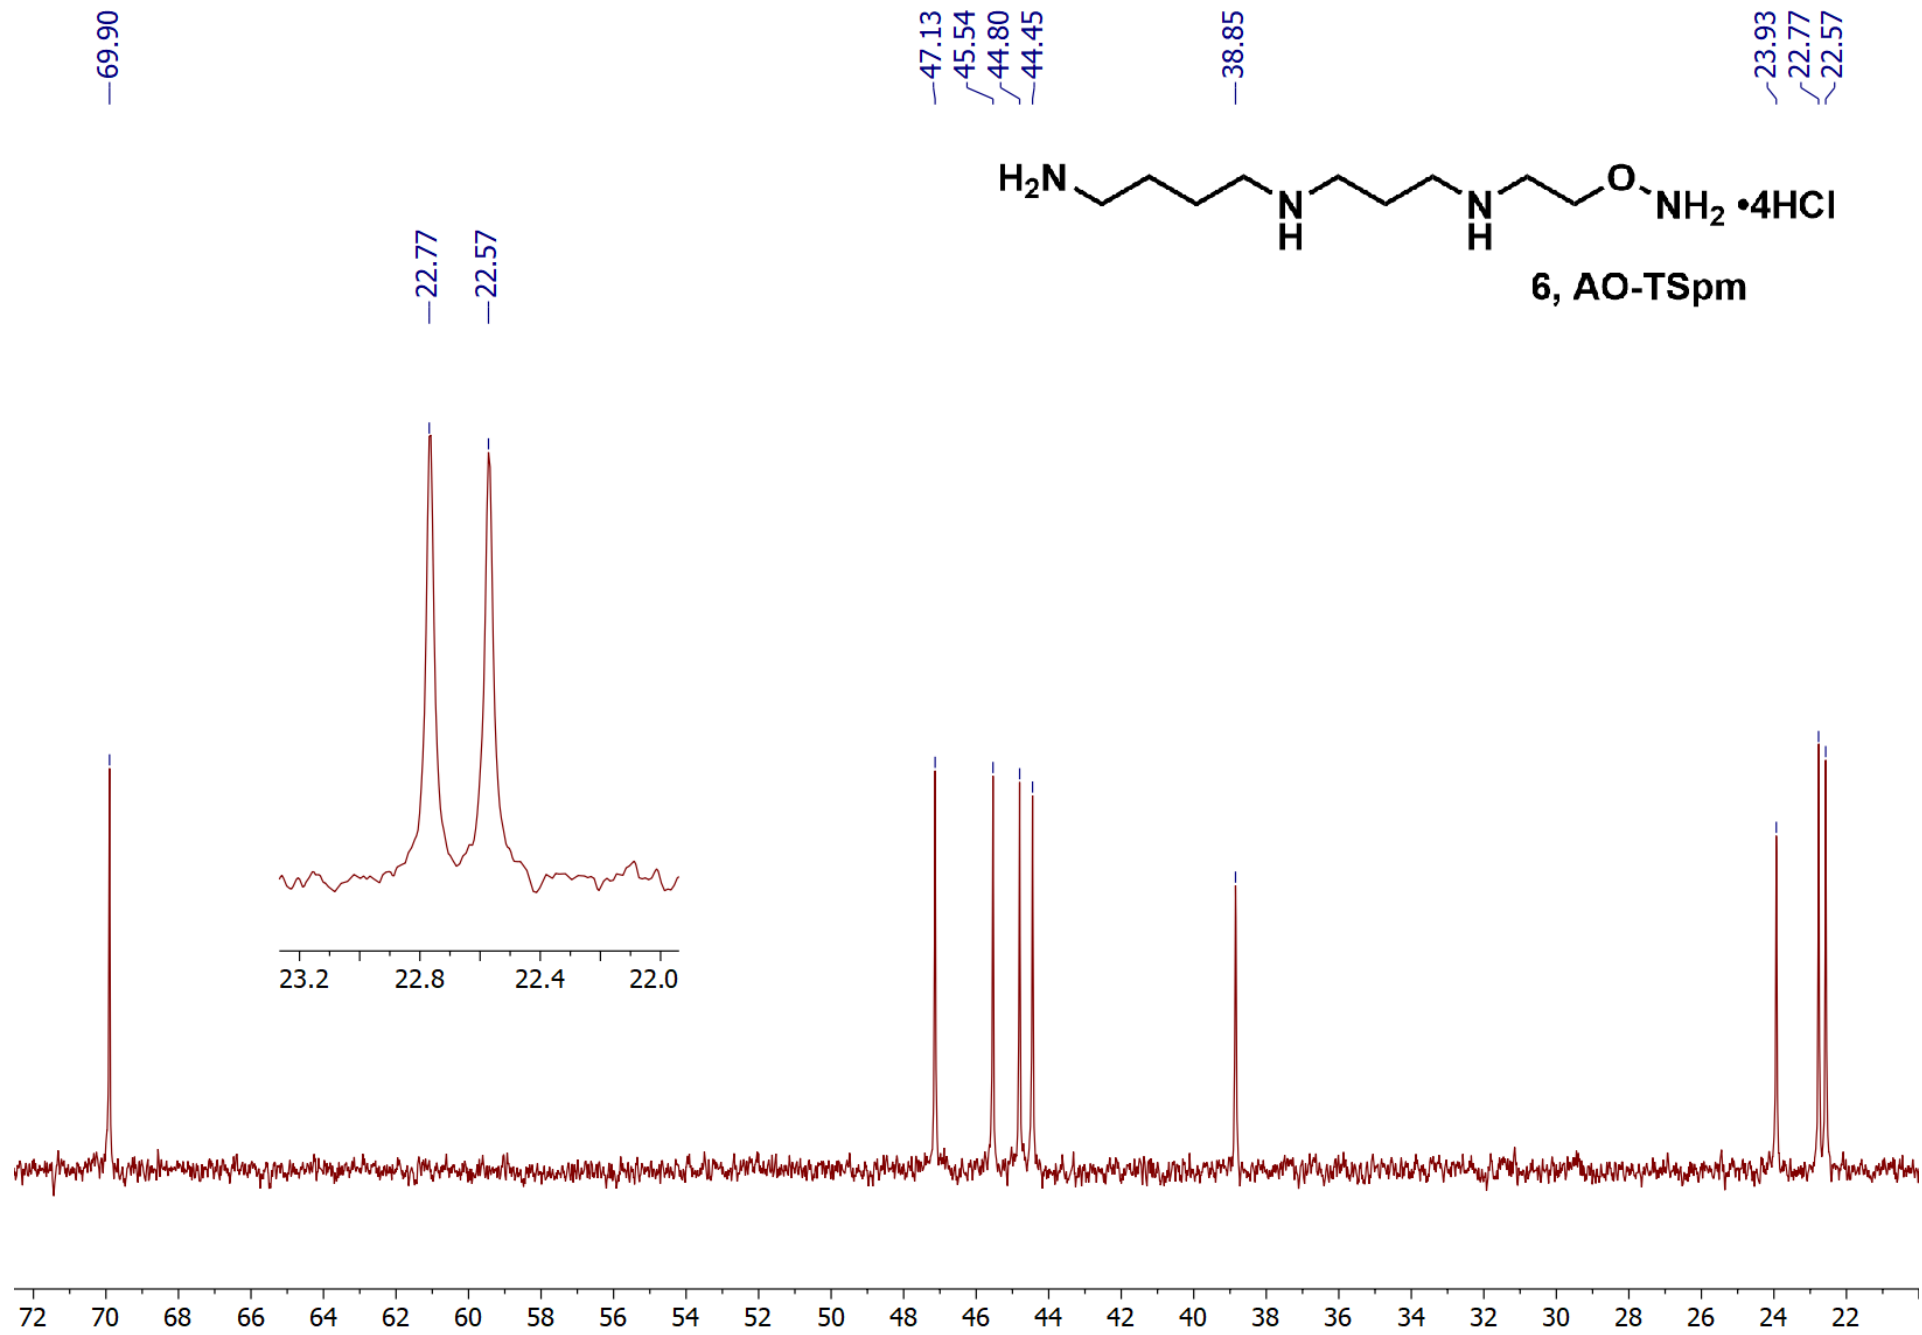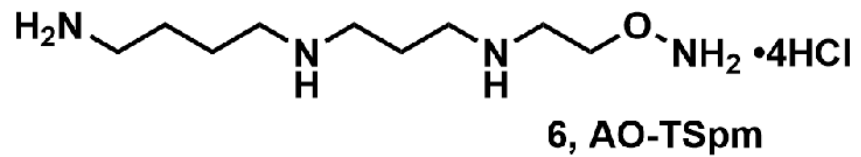

Figure S27.  $^{13}\text{C}$  NMR spectrum of AO-TSpM, 6.

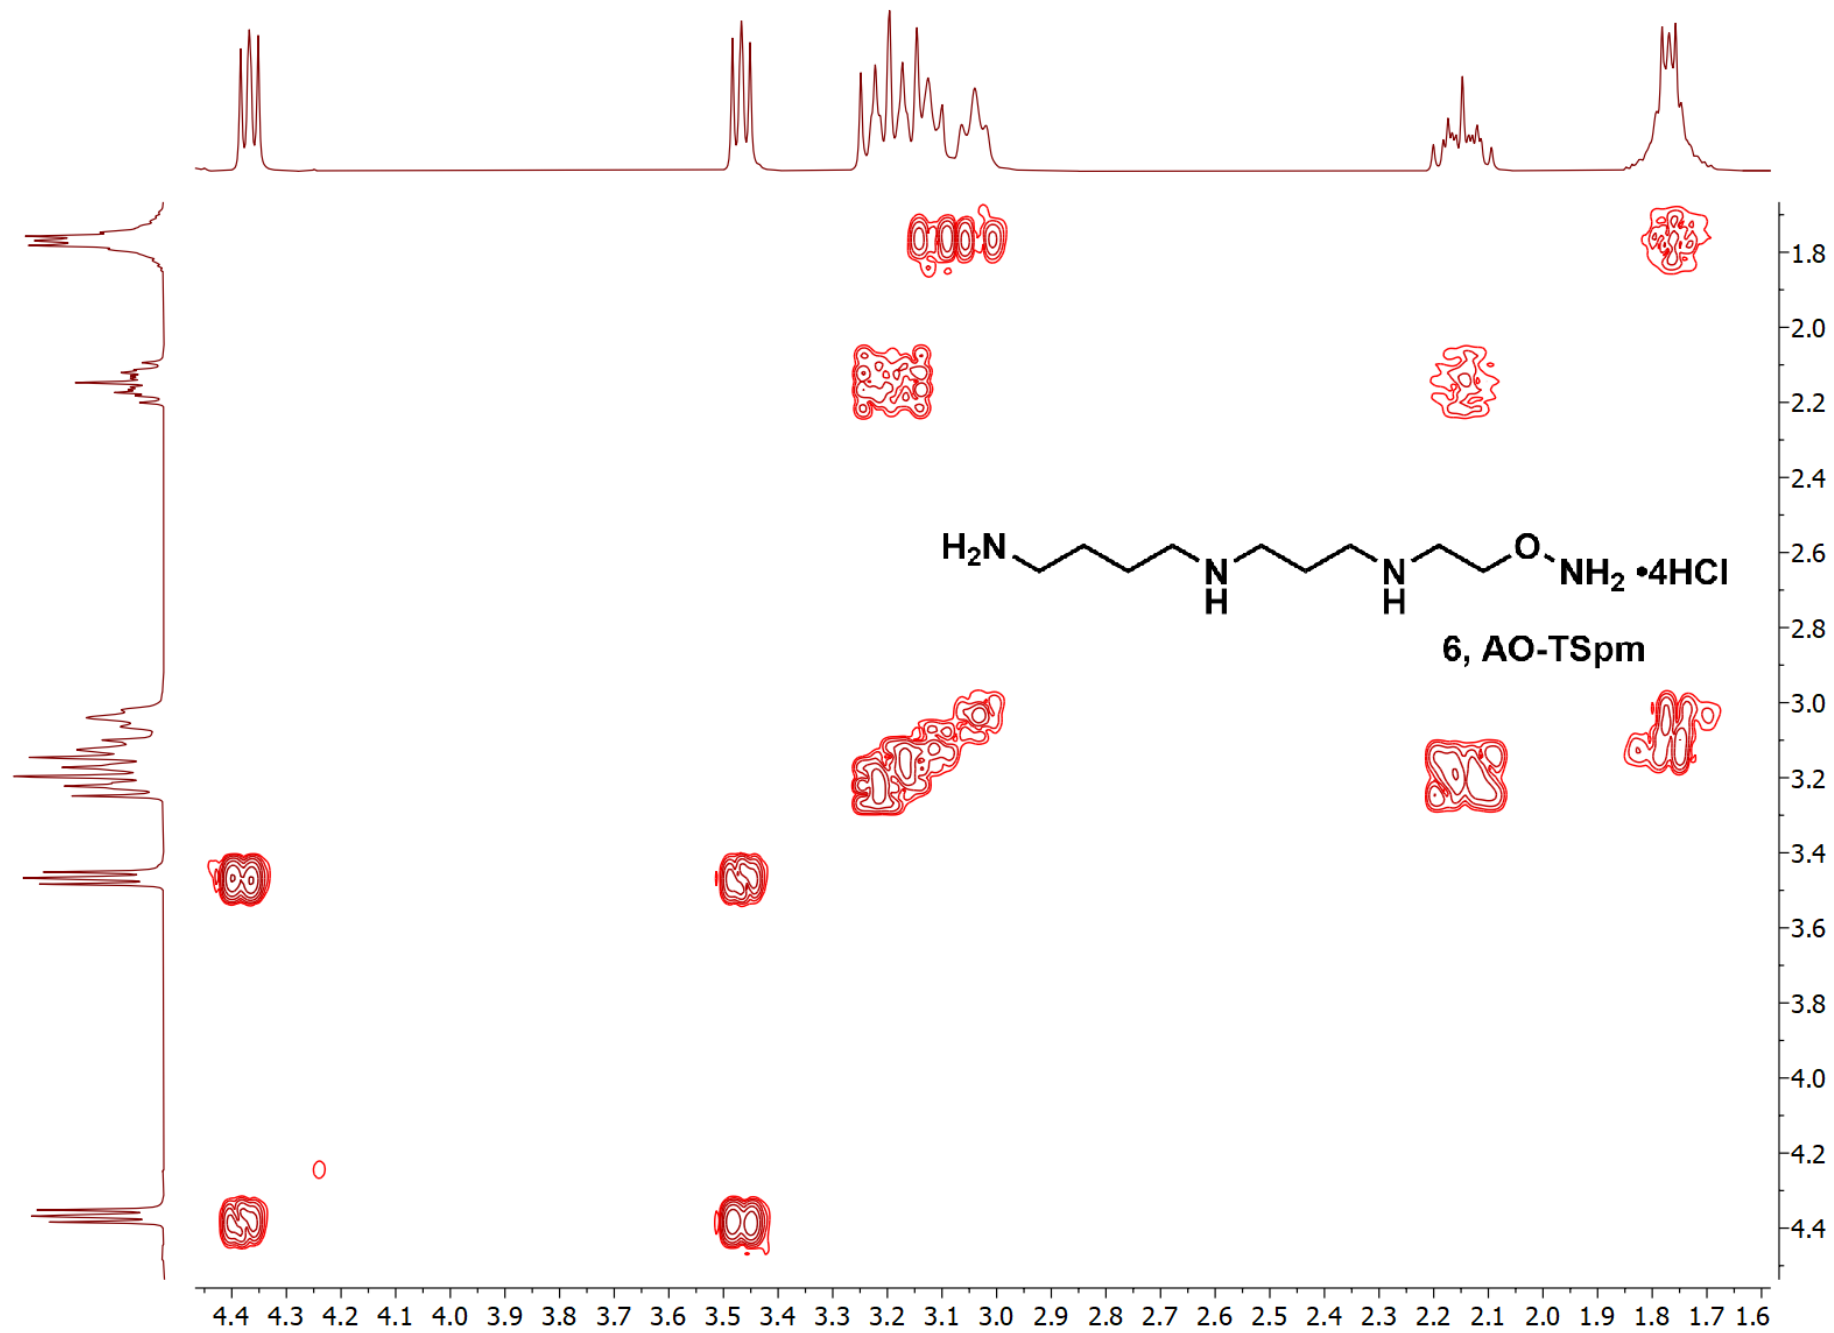

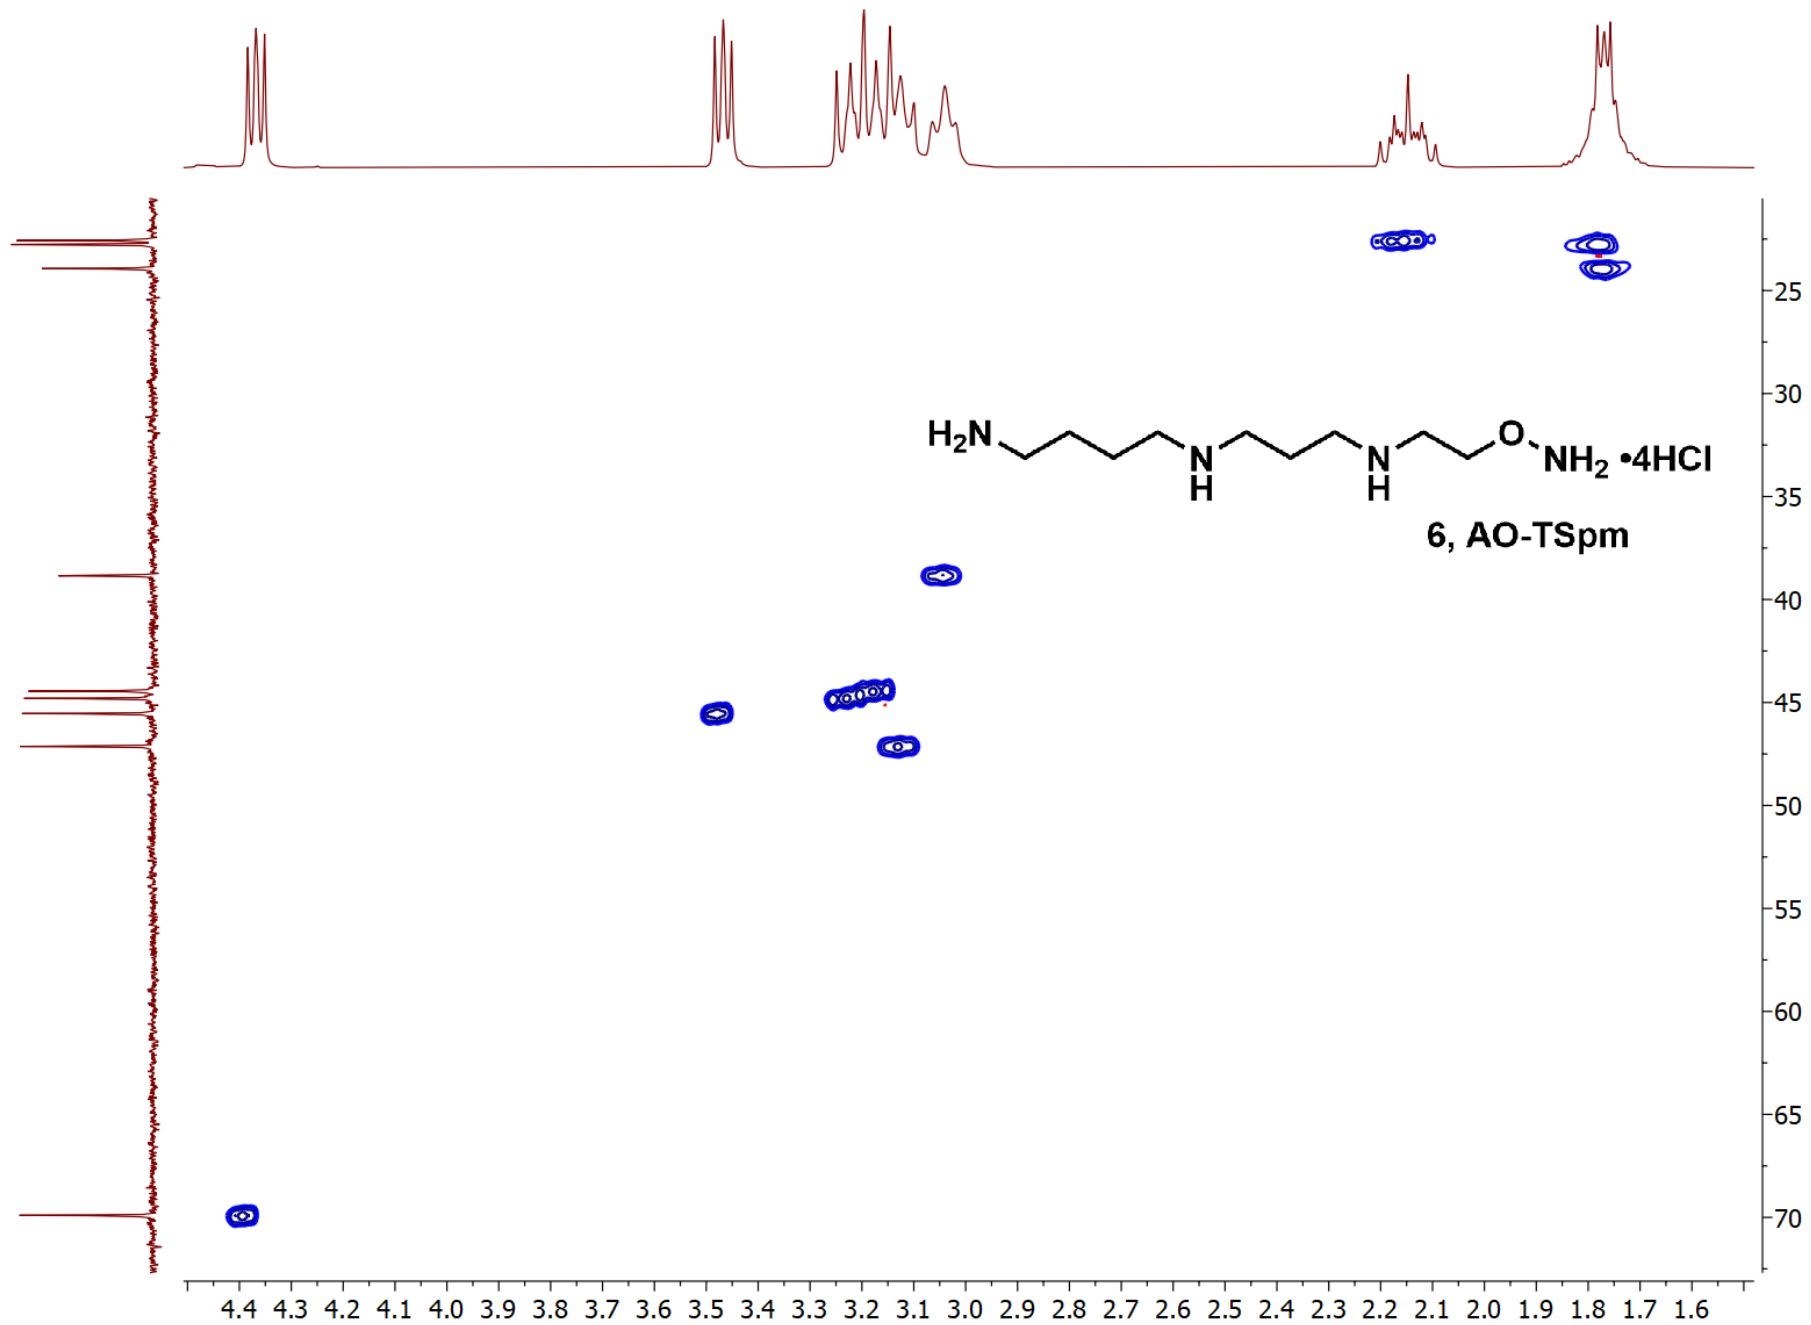

Figure S29. HSQC spectrum of AO-TSpM, 6.

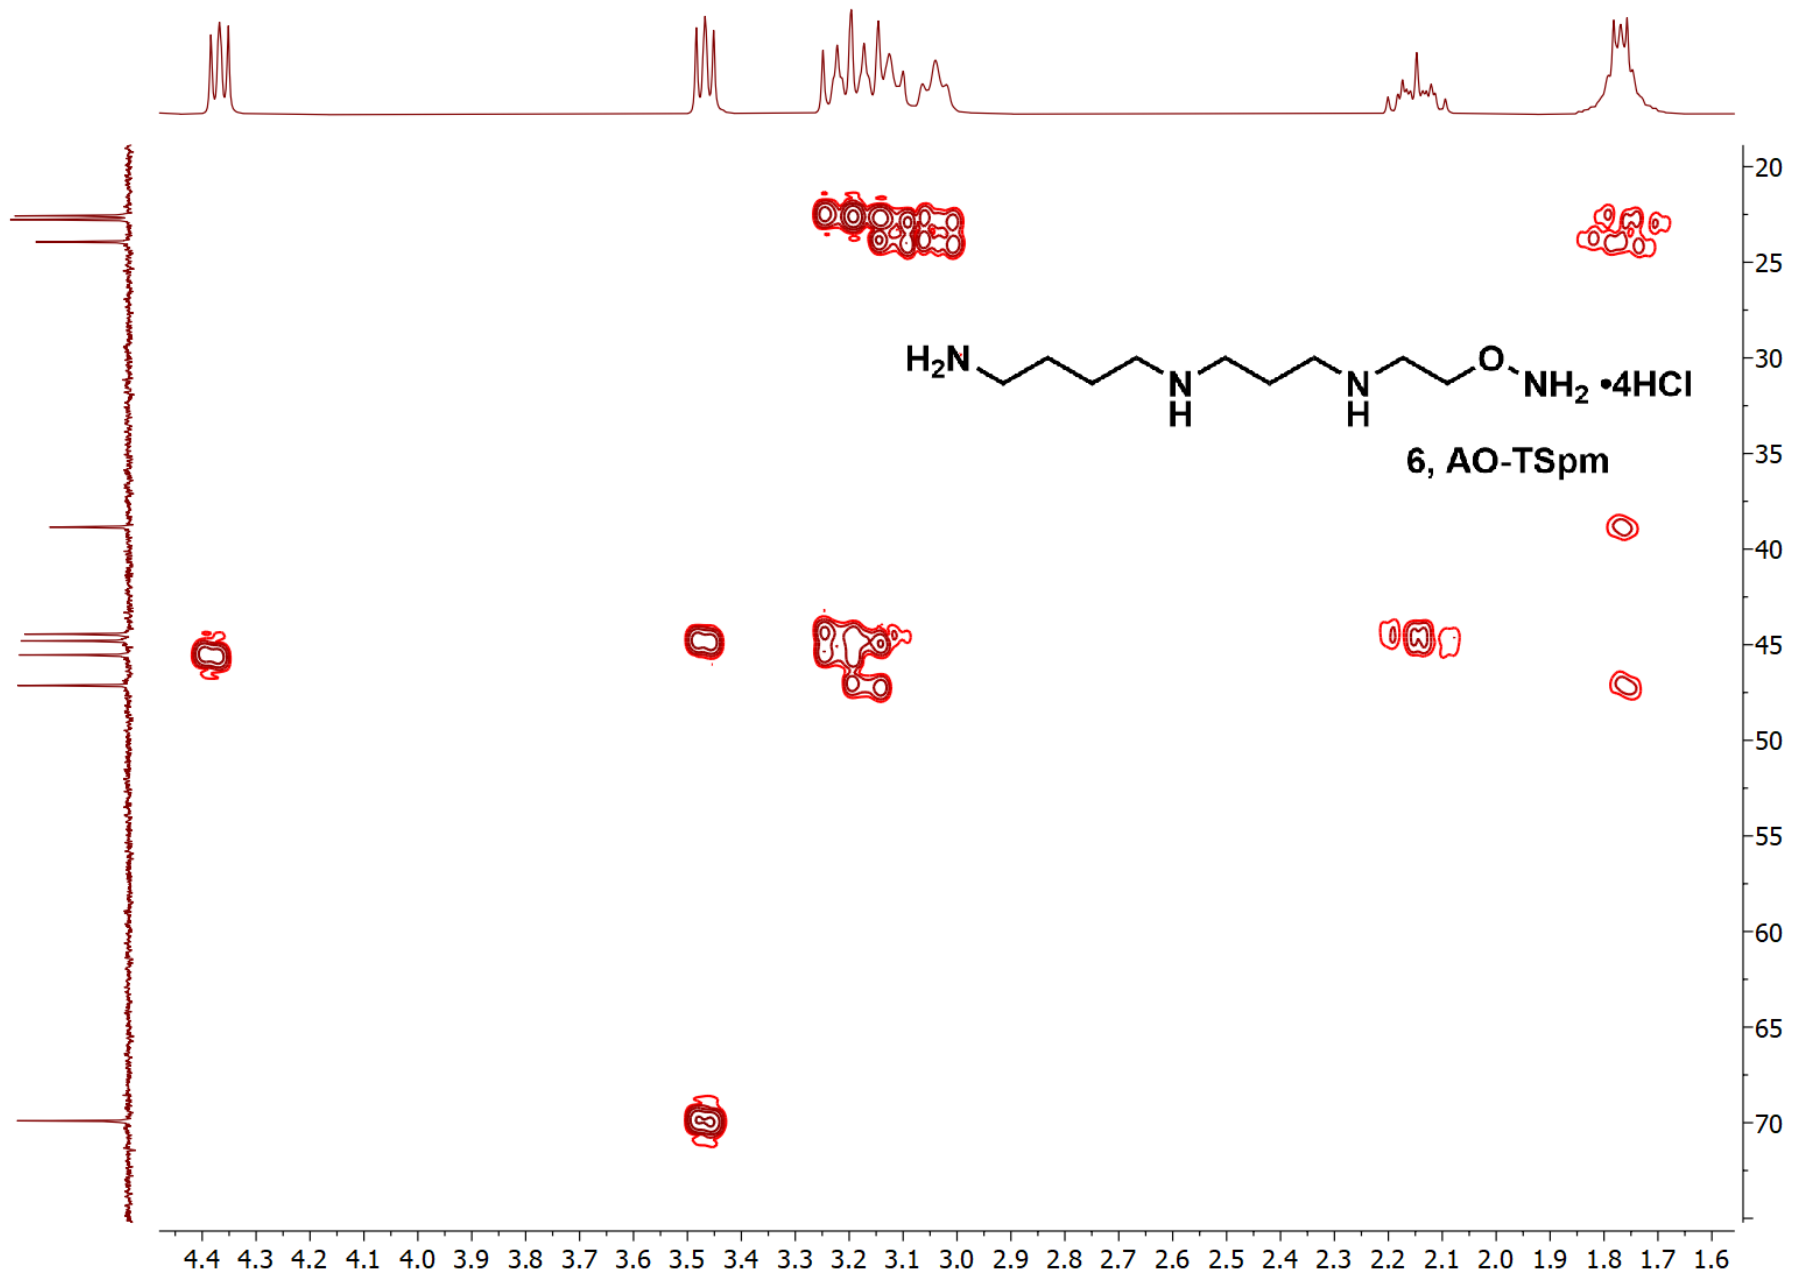

Figure S30. HMBC spectrum of AO-TSpM, 6.
